1 **Evolutionary transition to XY sex chromosomes associated with Y-linked duplication of a**  
2 **male hormone gene in a terrestrial isopod**

3

4 Aubrie Russell<sup>1</sup>, Sevarin Borrelli<sup>1</sup>, Rose Fontana<sup>1</sup>, Joseph Laricchiuta<sup>1</sup>, Jane Pascal<sup>1,2</sup>, Thomas  
5 Becking<sup>3</sup>, Isabelle Giraud<sup>3</sup>, Richard Cordaux<sup>3</sup>, Christopher H. Chandler<sup>1\*</sup>

6

7 <sup>1</sup>Department of Biological Sciences, State University of New York at Oswego, Oswego, NY,  
8 United States

9 <sup>2</sup>Current address: Center for Reproductive Evolution, Department of Biology, Syracuse  
10 University, Syracuse, NY, United States

11 <sup>3</sup>Laboratoire Ecologie et Biologie des Interactions, Equipe Ecologie Evolution Symbiose,  
12 Université de Poitiers, UMR CNRS 7267 Poitiers, France

13

14 \*Corresponding author:

15 Christopher H. Chandler

16 Department of Biological Sciences

17 State University of New York at Oswego

18 [christopher.chandler@oswego.edu](mailto:christopher.chandler@oswego.edu)

19

20 Key words: *Wolbachia*, Oniscidea, *Trachelipus*, androgenic gland hormone, AGH

21

22 **Abstract**

23

24 Sex chromosomes are highly variable in some taxonomic groups, but the evolutionary  
25 mechanisms underlying this diversity are not well understood. In terrestrial isopod crustaceans,  
26 interactions with *Wolbachia*, a vertically transmitted endosymbiont causing male-to-female sex  
27 reversal, are thought to drive rapid evolutionary turnovers in sex chromosomes. Here, we use  
28 surgical manipulations and genetic crosses, plus genome sequencing, to examine sex  
29 chromosomes in the terrestrial isopod *Trachelipus rathkei*. Although an earlier cytogenetics  
30 study suggested a ZZ/ZW sex chromosome system in this species, we surprisingly find that in  
31 our study population, sex is determined by an XX/XY system. Consistent with a recent  
32 evolutionary origin for this XX/XY system, the putative male-specific region of the genome is  
33 small. The genome shows evidence of sequences horizontally acquired from past *Wolbachia*  
34 infections, as well as evidence of Y-linked duplications of the androgenic gland hormone gene,  
35 thought to be a possible target for sex reversal by *Wolbachia*. Overall, these results are  
36 consistent with the hypothesis that reproductive endosymbionts such as *Wolbachia* can promote  
37 quick turnover of sex determination mechanisms in their hosts.

38

39

## 40 Introduction

41

42 Although sexual reproduction is shared by most eukaryotes, a variety of different cues can  
43 trigger individuals to follow a male, female, or hermaphroditic developmental plan (Conover &  
44 Kynard 1981; Janzen & Phillips 2006; Ospina-Álvarez & Piferrer 2008; Tingley & Anderson  
45 1986; Verhulst et al. 2010). In many eukaryotes, sex is primarily determined genotypically, and  
46 in most of those cases, sex chromosomes are the primary sex-determining factors, although  
47 some exceptions, including polygenic systems and haplodiploidy, are also known (Vandeputte  
48 et al. 2007; Heimpel & de Boer 2008). Sex chromosomes in animals are usually grouped into  
49 two main classes: XY systems, in which males are heterogametic (XY) and females are  
50 homogametic (XX); and ZW systems, in which females are heterogametic (ZW) and males are  
51 homogametic (ZZ). However, non-genetic cues can also play an important role in some species.  
52 For instance, environmental factors, such as temperature or population density, influence or  
53 determine phenotypic sex in reptiles, fishes, and invertebrates (Conover & Kynard 1981; Janzen  
54 & Phillips 2006; Tingley & Anderson 1986). In some cases, cytoplasmic factors, including sex-  
55 reversing endosymbionts, such as *Wolbachia*, microsporidia, and paramyxids can serve as a  
56 sex-determining signal (Bouchon et al. 1998; Pickup & Ironside 2018; Terry et al. 1998; Negri I  
57 et al. 2006; Kageyama et al. 2002).

58

59 Evolutionary theory holds that the formation of sex chromosomes begins when an autosome  
60 acquires a sex-determining locus (Rice 1996). Subsequently, recombination around the sex-  
61 determining locus is selected against because of sexually antagonistic selection (Bergero &  
62 Charlesworth 2009). For instance, selection should favor mutations that are beneficial in males  
63 but deleterious in females when those alleles are linked to a dominant male-determining allele;  
64 recombination, on the other hand, would break up this linkage and result in females that carry  
65 these male-beneficial alleles. The non-recombining region is then expected to spread in the

66 presence of continued sexually antagonistic selection, and may eventually span the whole sex  
67 chromosome, except for the usual presence of a small recombining pseudo-autosomal region  
68 (Charlesworth et al. 2005). Once recombination has ceased, the non-recombining sex  
69 chromosome, such as the Y chromosome in mammals or the W chromosome in birds, is  
70 expected to degenerate. Non-recombining genes frequently undergo pseudogenization,  
71 acquiring nonsense mutations or transposable element insertions (Charlesworth & Charlesworth  
72 2000). At the same time, gene trafficking can occur when selection promotes the translocation  
73 of formerly autosomal genes to the sex chromosomes (Emerson et al. 2004).

74  
75 Different species appear to be at different stages of sex chromosome evolution. For instance,  
76 the sex chromosomes of therian mammals are highly conserved, having originated ~160 million  
77 years ago (Potrzebowski et al. 2008; Veyrunes et al. 2008). The highly degenerated,  
78 heteromorphic Y chromosome represents an advanced stage of sex chromosome evolution. In  
79 other taxonomic groups, on the other hand, sex chromosomes appear to undergo more frequent  
80 evolutionary turnovers (Pennell et al. 2018; Cioffi et al. 2013; Myosho et al. 2015; Jeffries et al.  
81 2018; Ross et al. 2009; Vicoso & Bachtrog 2015). Such young sex chromosomes may have little  
82 or no recombination suppression, differentiation in gene content, or sex chromosome dosage  
83 compensation, and may not be detectable by traditional cytogenetic methods because they are  
84 visually indistinguishable (homomorphic) (Vicoso & Bachtrog 2015; Gamble et al. 2014). Sex  
85 chromosomes may even be polymorphic within a species, with different sex-determining loci  
86 segregating within or among populations (Traut 1994; Meisel et al. 2016; Ogata et al. 2008;  
87 Orzack et al. 1980).

88  
89 Unfortunately, we still have a limited understanding of why evolutionary turnovers of sex  
90 chromosomes are rare in some groups but frequent in others. A variety of models have been  
91 proposed to explain why these turnovers occur, including sexual antagonism, deleterious

92 mutations, and the 'hot potato' model (van Doorn & Kirkpatrick 2007; Blaser et al. 2013, 2014).  
93 In some organisms, interactions with vertically transmitted reproductive endosymbionts are also  
94 thought to influence the evolution of their hosts' sex determination mechanisms (Rigaud et al.  
95 1997; Cordaux et al. 2011). However, many of these models have been difficult to test in nature.  
96 This problem is exacerbated by the fact that, while sex chromosomes have been extensively  
97 studied in model organisms like *Drosophila*, studies are more sparse in non-model organisms.  
98  
99 One group that has received relatively little attention is crustaceans. Different crustacean  
100 species show a variety of distinct sex determining mechanisms, yet there are very few  
101 crustacean species in which candidate master sex-determining genes have been identified  
102 (Chandler et al. 2018, 2017). Within crustaceans, perhaps one of the best-studied groups in  
103 terms of sex determination is the terrestrial isopods (Oniscidea). Terrestrial isopod species have  
104 a mix of XY and ZW systems, along with reports of a few parthenogenic species and  
105 populations (Rigaud et al. 1997; Johnson 1986; Fussey 1984). The bacterial endosymbiont  
106 *Wolbachia* also influences sex determination by causing male-to-female sex reversal in some  
107 isopod hosts (Bouchon et al. 1998; Cordaux et al. 2004). In fact, interactions with *Wolbachia* are  
108 thought to drive rapid evolutionary turnover of the sex chromosomes in terrestrial isopods. This  
109 hypothesis is supported by multiple lines of evidence. For instance, in the common pillbug  
110 *Armadillidium vulgare*, a copy of the *Wolbachia* genome horizontally integrated into the host  
111 genome (formerly known as the *f* element) led to the origin of a new W chromosome (Leclercq  
112 et al. 2016). A recent phylogenetic analysis also identified, at minimum, several transitions in  
113 heterogametic systems along the isopod phylogeny, including closely related species pairs with  
114 different sex chromosome systems (Becking et al. 2017). Moreover, only a few species of  
115 terrestrial isopods are known to have heteromorphic sex chromosomes, in which the X and Y, or  
116 Z and W, chromosomes are visually distinguishable in cytogenetics experiments (Rigaud et al.  
117 1997), and WW or YY individuals are often viable and fertile (Juchault & Rigaud 1995; Becking

118 et al. 2019), suggesting that the W and Y chromosomes have not lost any essential genes in  
119 these species.

120  
121 In this study, we examined sex determination in the widespread species *Trachelipus rathkei*.  
122 This species was previously established by cytogenetic methods to have heteromorphic, albeit  
123 slightly, Z and W sex chromosomes (Mittal & Pahwa 1980). We sought to confirm female  
124 heterogamety by crossing females to sex-reversed neo-males (which have female genotypes  
125 but male phenotypes), and assessing the sex ratio of the resultant progenies. Surprisingly, we  
126 found that, at least in our focal population, sex is determined by an XX/XY system, suggesting a  
127 recent sex chromosome turnover. To test this hypothesis, we performed whole-genome  
128 sequencing. Consistent with a recent origin of an XX/XY sex determination system, we find  
129 evidence that the putative male-specific region of the genome is small, and we identified a male-  
130 specific partial duplication of the androgenic gland hormone (AGH) gene, a rare example of a  
131 candidate sex-determining gene in a crustacean. In addition, although our study population  
132 does not appear to harbor current *Wolbachia* infections, we find genomic evidence of past  
133 infections. Overall, our results are consistent with the hypothesis that sex-reversing  
134 endosymbionts like *Wolbachia* can drive rapid evolutionary turnover of sex chromosomes in  
135 their hosts.

136

## 137 **Methods**

138

### 139 Animal collection and husbandry

140

141 We sampled wild isopods from Rice Creek Field Station (RCFS) at SUNY Oswego in Oswego,  
142 NY. We captured animals using a combination of methods. First, we haphazardly searched  
143 through leaf litter, logs, and rocks. We also used “potato traps”, made by carving out a 1-2 cm

144 diameter core from a potato and placing it in the litter for 1-2 weeks. Finally, we constructed  
145 pitfall traps from plastic cups buried in the ground with the rim of the cup flush with the ground.  
146 The primary species captured were *Oniscus asellus* and *Trachelipus rathkei*, but we also  
147 captured *Philoscia muscorum*, *Hyloniscus riparius*, *Trichoniscus pusillus*, and occasionally  
148 *Cylisticus convexus*. Species identification was performed in the field and confirmed in the lab,  
149 where we also determined the phenotypic sex of specimens.

150  
151 Isopods were housed in plastic food storage containers with holes in the lids for air exchange,  
152 on a substrate of moistened soil. Containers were checked twice weekly. Animals were fed  
153 carrots and dried leaves *ad libitum*. The photoperiod was kept on a schedule of 18:6 light  
154 hours:dark hours in the summer and and 14:10 in the winter. We isolated ovigerous females in  
155 individual containers, and separated offspring from their mothers upon emergence from the  
156 marsupium. We initially sexed offspring at six to eight weeks old, and separated males from  
157 females to prevent sibling mating. We then double-checked offspring sex at roughly two week  
158 intervals thereafter until four months of age to watch for individuals that might have shown late  
159 signs of sexual differentiation. Terrestrial isopods are known to store sperm from a single mating  
160 to fertilize future broods. Therefore, for experimental crosses we only used *T. rathkei* females  
161 that were born in the lab, separated from brothers as soon as they could be sexed, and which  
162 had not produced any offspring by 12 months of age.

163  
164 *Wolbachia* testing

165  
166 We used PCR assays to detect *Wolbachia* in *T. rathkei* individuals. DNA was extracted from  
167 one or two legs, depending on the size of the animal. We ruptured the leg tissue in 400 µL  
168 deionized water along with a few 0.5 mm zirconia/silica beads (enough to cover the bottom of  
169 the tube) using a bead beater machine. Samples were lysed following a protocol of 2500 RPM

170 for 10 seconds, followed by 4200 RPM for 10 seconds, and finally 4800 RPM for 10 seconds.  
171 The tube was then visually inspected to confirm the leg was sufficiently pulverized. We then  
172 transferred the lysate to a new tube, added 60  $\mu$ L of a 5% Chelex® 100 molecular biology grade  
173 resin suspension, and incubated for 15 minutes at 100° C. After incubation, we centrifuged the  
174 extract at 16,000g for 3 minutes, and reserved 80  $\mu$ L of supernatant for PCR testing. We  
175 confirmed successful DNA extraction using the mitochondrial primers HCO2198/LCO1490  
176 (Folmer et al. 1994). We performed PCRs in 10  $\mu$ L reactions, using 4.95  $\mu$ L of molecular biology  
177 grade water, 2  $\mu$ L NEB OneTaq Buffer, 1  $\mu$ L of mixed dNTPS at a final concentration of 2mM for  
178 each dNTP, 1  $\mu$ L of a 5  $\mu$ M solution of each primer, and 0.05  $\mu$ L of NEB OneTaq. For the  
179 mitochondrial primer set, PCR conditions included an initial denaturation of 94° C for 1 minute; 5  
180 cycles of 94° C denaturation for 30s, 45° C annealing for 90s, and 68° C extension for 60s. The  
181 samples then underwent 35 cycles of 94° C for 30s, 51° C for 90s, and 68° C for 60s. This was  
182 followed by a final extension step of 68° C for 5 minutes. To test for *Wolbachia*, we performed  
183 PCR using *Wolbachia*-specific primers targeting the *wsp* (81f/691r) and *ftsZ* (*ftsZf1/ftsZr1*)  
184 genes (Braig et al. 1998; Werren John H. et al. 1995). We performed PCRs in 10  $\mu$ L reactions,  
185 using 4.95  $\mu$ L of molecular biology grade water, 2  $\mu$ L NEB OneTaq Buffer, 1  $\mu$ L of mixed dNTPs  
186 at a final concentration of 2mM for each dNTP, 1  $\mu$ L of either *wsp* or *ftsZ* primers, and 0.05  $\mu$ L  
187 of NEB OneTaq. PCR conditions contained an initial denaturation of 95°C for 5 minutes,  
188 followed by 36 cycles of 95° C for 60s, 54° C for 60s, and 68°C for 3 minutes. This was followed  
189 by a final extension step at 68° C for 10 minutes.

190

#### 191 Androgenic gland implantation and crosses

192

193 To test whether sex is determined by a ZZ/ZW or XX/XY system of sex determination in our  
194 population of *T. rathkei*, we performed crosses between females and experimentally sex-  
195 reversed neo-males. Juvenile female *T. rathkei* were implanted with live androgenic glands,



196 according to (Becking et al. 2017). Male donors and female recipients were selected from large  
197 lab-reared broods with even (~1:1) sex ratios. An adult male was sacrificed by decapitation, and  
198 live androgenic glands were dissected into Ringer solution (393 mM NaCl, 2 mM KCl, 2 mM  
199  $\text{CaCl}_2 \cdot 2\text{H}_2\text{O}$ , 2 mM  $\text{NaHCO}_3$ ). Female recipients were between 5 and 8 weeks old, an age at  
200 which males and females begin to become distinguishable, but at which sexual development is  
201 not complete. The gland was injected using a pulled glass pipette into a hole pierced with a  
202 dissecting needle in the 6th or 7th segment of the juvenile female's pereon. Recipients were  
203 isolated in a small plastic container with a moist paper towel for recovery and observation.  
204 Experimental animals were monitored for signs of male development. Any animal that failed to  
205 develop male genitalia by 4 months post-implantation was considered to be a failed injection.  
206 After maturation, adult neo-males were placed in individual containers with 1-3 previously  
207 unmated females. Crosses were monitored twice weekly to check for signs of reproduction in  
208 females. Gravid females were then isolated into their own containers until parturition.

209

## 210 Genome sequencing

211

212 All raw sequencing data and the draft genome assembly are available under NCBI BioProject  
213 PRJNA633105. Data analysis scripts are available at  
214 [https://github.com/chandlerlab/trachelipus\\_genome](https://github.com/chandlerlab/trachelipus_genome).

215

216 We performed whole-genome sequencing using a combination of Illumina, PacBio, and Oxford  
217 Nanopore sequencing, with multiple sequencing samples of each sex (Table 1). Because we  
218 expected the *T. rathkei* genome to be large, repetitive, and highly polymorphic, and because we  
219 expected to need to isolate DNA from multiple individuals, we established a partially inbred  
220 laboratory line using offspring from a single female collected from RCFS. We mated brothers  
221 and sisters from this female for two generations in the lab prior to collecting genetic samples

222 from the third generation for sequencing. DNA was collected for sequencing using the Qiagen  
223 DNEasy Blood and Tissue Kit following the manufacturer's instructions. DNA was quantified  
224 using the Qubit DNA Broad Range assay kit, and the A260/280 value was checked with a  
225 Nanodrop spectrophotometer. Samples were stored at -80°C prior to being shipped to the  
226 sequencing center. Illumina sequencing was performed at the State University of New York at  
227 Buffalo Genomics and Bioinformatics Core Facility.

228  
229 For PacBio sequencing, we had to pool DNA from multiple individuals to obtain sufficient  
230 quantities of DNA for library preparation. We performed separate DNA extractions from three  
231 individuals of each sex as above. Then, we pooled the DNA from the three individuals of each  
232 sex and concentrated it using Ampure XP beads (Beckman-Coulter). Briefly, we washed the  
233 beads three times in molecular biology grade water, once in Qiagen buffer EB, and finally re-  
234 suspended the beads in their original buffer. We then added equal volumes of Ampure XP  
235 suspension to the DNA samples, mixed them on a shaker for 15 minutes, placed the tubes on a  
236 magnetic bead separator, and removed the supernatant. We washed the beads twice with 1.5  
237 mL of 70% ethanol, and finally eluted the DNA samples in 30 µL of Qiagen buffer EB.

238 Sequencing libraries were prepared and sequenced at the University of Delaware Sequencing &  
239 Genotyping Center on a PacBio RSII.

240  
241 We also supplemented our PacBio dataset with Oxford Nanopore sequencing data. We isolated  
242 DNA from a single *T. rathkei* female and two separate males using a Qiagen DNEasy Kit as  
243 described above. We then performed sequencing on Oxford Nanopore Minion flowcells (R9.4)  
244 with the Rapid Sequencing Kit (SQK-RAD004) following the manufacturer's instructions.

245  
246 Genome assembly

247

248 We performed a hybrid assembly combining the short- and long-read sequence data. We first  
249 removed adapters and trimmed the Illumina sequencing data using Trimmomatic v. 0.36 (Bolger  
250 et al. 2014); we removed leading and trailing bases, as well as internal windows of at least 4bp,  
251 with a quality score of 5 or lower, and discarded any reads shorter than 36bp after trimming. We  
252 then used SparseAssembler (Ye et al. 2012) to assemble the cleaned Illumina data from sample  
253 Mpool (to minimize the number of sequence polymorphisms that would be present in the data  
254 with additional samples), using two different kmer sizes (k=51 and k=61). After performing  
255 preliminary quality checks using Quast (Gurevich et al. 2013), we decided to proceed with the  
256 k=61 assembly, which had the longer total length and N50 (Supplementary Table 1). However,  
257 because we suspected the genome might still contain high levels of heterozygosity despite two  
258 generations of inbreeding, we used Redudans (Pryszcz & Gabaldón 2016) to remove putative  
259 allelic contigs from the Illumina-only assembly; we set identity and overlap thresholds of 95%.

260  
261 Prior to performing hybrid assembly, we used the short reads to correct sequencing errors in the  
262 long reads using FMLRC (Wang et al. 2018) with the default settings, except requiring a  
263 minimum count of 3 to consider a path (-m 3). PacBio and Oxford Nanopore reads derived from  
264 female isopods were corrected using Illumina sample Fpool, while long reads from male  
265 samples were corrected using sample Mpool.

266  
267 We next performed hybrid assembly using DBG2OLC (Ye et al. 2016), which accepts a short-  
268 read assembly (rather than raw short-read sequence data) and long-read sequence data (in this  
269 case, our PacBio and Oxford Nanopore reads) as input. We tested out a range of different  
270 parameter values: from the Redundans-filtered assembly, we first removed contigs less than  
271 100bp or 200bp; we tested kmer sizes of 17 and 19; for the kmer coverage threshold, we tried  
272 values of 2 and 5; and for the minimum overlap, we tried values of 10 and 30. We used an

273 adaptive threshold of 0.01. These assemblies ranged in size from ~5.2 Gb to 8.5 Gb; we  
274 selected three assemblies across the range of total sizes for further processing.

275  
276 We next corrected errors in these assemblies, caused by the relatively high error rates in long-  
277 read sequence data. In the standard DBG2OLC pipeline, the resulting contigs are corrected  
278 using the contigs from the short-read assembly and from the long reads using Sparc (Ye & Ma  
279 2016); however, in our initial attempts, large portions of the assemblies went uncorrected,  
280 perhaps because we had relatively low-coverage long-read data. Therefore, instead we  
281 performed three rounds of error correction using Pilon (Walker et al. 2014), by mapping the raw  
282 Illumina sequence reads to each assembly using bbmap (first two rounds; (Bushnell et al.  
283 2017)) and bwa mem (third round; with the parameters -A 1 -B 1 -O 1 -E 1 -k 11 -W 20 -d 0.5 -L  
284 6 for mapping to an error-prone assembly; (Li 2013)).

285  
286 Finally, we assessed the quality of each assembly using BUSCO v.3.0.2 (Simão et al. 2015),  
287 with the arthropod reference gene set, and selected the assembly with the greatest number of  
288 BUSCO reference genes present for further analysis.

289  
290 To remove contaminants from the final assembly, we generated blob plots using Blobtools v.1.0  
291 (Laetsch & Blaxter 2017). To accomplish this, we BLASTed all contigs against the NCBI  
292 nucleotide (nt) database using megablast (Morgulis et al. 2008) and against Uniprot reference  
293 proteomes using diamond blastx (Buchfink et al. 2015). We then removed any contigs that were  
294 identified as coming from plants, fungi, viruses, or bacteria, except for those matching  
295 *Wolbachia*.

296  
297 Genome annotation

298

299 We used RepeatModeler v.1.0.10, which uses RECON (Bao & Eddy 2002), RepeatScout (Price  
300 et al. 2005), and Tandem Repeat Finder (Benson 1999), to construct a custom repeat library for  
301 *T. rathkei*. Because we were unable to run RepeatModeler successfully using the full assembly,  
302 we ran RepeatModeler on a random subset 40% of the contigs; this should still successfully  
303 identify most repetitive elements in the genome as long as all repeat families are still well  
304 represented in the subset. We then masked the assembly using RepeatMasker 4.0.7 (Tarailo-  
305 Graovac & Chen 2009).

306  
307 We annotated coding sequences using the MAKER pipeline (Cantarel et al. 2008). We initially  
308 ran MAKER using assembled transcript sequences (est2genome=1) from previously available  
309 data from one wild-caught male and one wild-caught female *T. rathkei* from the same population  
310 (Becking et al. 2017) (SRR5198727, SRR5198726), along with protein alignments against  
311 Uniprot-Swissprot (version March 2020) and used the resulting output to train SNAP (Korf  
312 2004). To train AUGUSTUS (Stanke et al. 2006) we used the output from the BUSCO quality  
313 assessment described earlier. We then completed a final round of MAKER using the trained  
314 gene models.

315

#### 316 Development of sex-linked PCR markers

317

318 We used multiple approaches to develop male-specific, putatively Y-linked PCR markers. Initial  
319 attempts to perform a genomic assembly with male samples and then identify contigs with zero  
320 coverage in females were unsuccessful. We therefore developed a complementary approach by  
321 looking for male-specific k-mers in the raw sequencing reads. We used kmc v.3.1.0 (Kokot et al.  
322 2017) to count all the canonical 21-mers in each of the Illumina sequencing datasets (in other  
323 words, each 21-mer and its reverse complement were considered to be the same k-mer during  
324 counting). We then searched for k-mers that occurred at least 8 times in the Mpool Illumina

325 sequencing dataset and a total of at least 3 times combined across the lower coverage M2, M5,  
326 M6, and wildM samples, but which were completely absent from all female samples. We then  
327 extracted all sequence reads containing these candidate male-specific k-mers using mirabait  
328 v.4.0.2 (Chevreux et al. 1999), and assembled them using Spades v.3.11.1 (Bankevich et al.  
329 2012).

330  
331 To test male-specificity of these contigs, we used polymerase chain reaction (PCR). We  
332 developed PCR primers for a subset of candidate male-specific contigs. To identify the best  
333 candidates, we first mapped raw sequencing reads from all male and female samples to the full  
334 genome sequence plus the candidate male-specific contigs, and identified contigs that had  
335 coverage in male samples but not female samples; we also avoided contigs that showed  
336 evidence of containing repeat elements, after BLAST searches against the whole genome  
337 assembly. We designed primers using PRIMER3 (Untergasser et al. 2012, 3). In these PCRs,  
338 primers were initially screened using template DNA from two male samples and two female  
339 samples; primers that showed evidence of sex specificity after this first PCR were re-tested  
340 using a larger number of samples. PCR primers were initially tested using a cycle of 98°C for 3  
341 minutes, followed by 40 cycles of 98°C for 15s, 50°C for 35s, and 68°C for 60s; this was  
342 followed by a final extension step of 68°C for 10 minutes. For samples that did not amplify under  
343 this program, a gradient PCR was run to determine optimal annealing temperature. All PCRs  
344 were performed using the same recipe and reaction conditions as the *Wolbachia* PCRs  
345 described above.

346  
347 We also identified open reading frames (ORFs) in these candidate male-specific contigs using  
348 Transdecoder v.4.0.0 (Haas & Papanicolaou 2016), and annotated the ORFs using Trinotate  
349 v.3.1.1 (Bryant et al. 2017). Subsequently, we designed additional primers targeting these  
350 ORFs.

351

## 352 **Results**

353

### 354 No *Wolbachia* and balanced sex ratios in *T. rathkei*

355

356 Among the 100+ individuals captured and tested between 2015 and 2017, no *T. rathkei* from  
357 RCFS conclusively tested positive for *Wolbachia*. This was not due to inadequate testing  
358 protocols; for instance, a captive population of *Porcellio laevis* housed in our lab shows nearly a  
359 100% infection rate using the same methods (not shown). Approximately 150 *T. rathkei* broods  
360 were raised in the lab from either mated, wild-caught females or first-generation crosses. The  
361 mean and median brood sizes of this species in our lab were 27.1 and 22.5 offspring,  
362 respectively, and the vast majority of these broods had a balanced sex ratio (Supplementary  
363 Table 2). Thus, the prevalence of *Wolbachia* and other sex ratio distorters is at most very low in  
364 this population of *T. rathkei*. In addition, some wild-caught females produced broods even after  
365 several months to a year in isolation in the lab (Supplementary Table 2), confirming that this  
366 species is capable of long-term sperm storage.

367

### 368 Crossing sex-reversed individuals indicates an XY sex determination system

369

370 Five juveniles implanted with androgenic glands survived to mature into males; they were  
371 crossed with virgin females from families with normal sex ratios. Each putative neo-male was  
372 paired with 2 to 3 females, and each female produced 1-3 broods of offspring. Two of these  
373 males sired broods with balanced sex ratios (not significantly different from a 1:1 ratio of males  
374 to females; Table 2); these were likely individuals that would have developed into males even  
375 without the AG implantation, and thus are uninformative with respect to the sex determination  
376 system (Becking et al. 2017). However, three other males produced only female offspring,

377 consistent with an XX/XY system (XX neo-male × XX female yields all XX and therefore 100%  
378 female offspring) but not a ZZ/ZW system (ZW neo-male × ZW female expected to produce 1/4  
379 ZZ, 1/2 ZW, and 1/4 WW offspring, thus 75% female or 66.7% female depending on whether  
380 WW genotypes are viable).

381

## 382 Genome assembly

383

384 The draft genome assembly of *T. rathkei* is approximately 5.2 Gb in total length. The genome is  
385 highly repetitive, consisting of approximately 70% repetitive elements. Transposable elements  
386 constitute the largest repeat category, with LINEs, followed by DNA elements and LTRs, being  
387 the most represented (Figure 1). All repeat families seem to have a single divergence peak of  
388 around 7-10% (Figure 1).

389

390 Despite its large size, the draft assembly is likely only partially complete, with ~25% of arthropod  
391 BUSCO genes missing (Table 3). There were 15,805 transcripts assembled from the previously  
392 available transcriptome dataset whose best hits in blastn searches against the NCBI nt  
393 database and diamond blastx searches against Uniprot-Swissprot were from other arthropods;  
394 of those, only 53% had nearly full-length matches in the genome ( $\geq 90\%$  of the transcript length  
395 at  $\geq 90\%$  sequence identity), suggesting some missing data and/or remaining uncorrected  
396 sequencing errors in the draft assembly as well.

397

398 We screened the *T. rathkei* genome for *Wolbachia* nuclear insertions by BLASTing the  
399 assembled contigs against a collection of *Wolbachia* genome sequences, and then BLASTing  
400 the matching regions against all representative bacterial genomes from RefSeq to rule out false  
401 positives. After this filtering step, we were left with 1010 high confidence matches (best BLAST  
402 hit in a *Wolbachia* genome, e-value  $< 1 \times 10^{-6}$ ) spread across 719 contigs, with a total length of



403 ~350 kb for the matching sequences (Supplementary Table 3), much smaller than a typical full  
404 *Wolbachia* genome of about 1 - 1.6 Mb on average (Sun et al. 2001). These likely horizontally  
405 acquired sequences clustered closely with *Wolbachia* strain *wCon* from the isopod *Cylisticus*  
406 *convexus* (Badawi et al. 2018) with 100% bootstrap support, in a group sister to *wVulC* and the *f*  
407 element of *Armadillidium vulgare* (Leclercq et al. 2016) (Figure 2). Moreover, there were  
408 multiple insertions carrying sequences similar to the cytoplasmic incompatibility genes *cifA* and  
409 *cifB* genes (LePage et al. 2017; Beckmann et al. 2017; Lindsey et al. 2018). These *cifA*- and  
410 *cifB*-like sequences probably represent nonfunctional pseudogenes, however, as they show  
411 evidence of being broken up by insertions (Supplementary Figure 1).

412

#### 413 Searching for candidate sex-determining genes

414

415 We identified  $\sim 6.04 \times 10^6$  21-mers as potentially male-specific, suggesting there is  
416 approximately 6 Mb of male-specific sequence content in the genome. However, when we  
417 isolated the raw sequencing reads containing those 21-mers and assembled them, we obtained  
418 89.4 Mb of assembled sequences, suggesting the male-specific region may be as large as  $\sim 90$   
419 Mb, but still shares significant similarity with the X chromosome. Even if up to 90 Mb of  
420 sequence is partially sex-linked, this represents just 1.7% of the genome, consistent with an  
421 evolutionarily young Y chromosome in this species.

422

423 Of the initial 16 candidate Y-linked PCR markers designed from anonymous sequences, none  
424 showed the expected pattern of male-specific amplification in our early tests (Supplementary  
425 Table 4). This may be due to the highly repetitive nature of the *T. rathkei* genome, despite our  
426 best efforts to target primers to non-repetitive sequences.

427

428 Because the candidate male-specific contigs were assembled from Illumina data only and thus  
429 short and fragmented, we were unable to screen them for annotated candidate sex-determining  
430 genes using the typical MAKER pipeline. However, we were able to identify open reading  
431 frames (ORFs) and annotate them like transcripts using Trinotate (Bryant et al. 2017). Two  
432 contigs in the male-specific assembly showed homology to the androgenic gland hormone  
433 (AGH) gene upon annotation, suggesting there may be a Y-linked duplication of the AGH gene.  
434 Therefore, we designed PCR primers specifically targeting one of the Y-linked AGH-like  
435 sequences (AGHY1 on NODE\_44048\_length\_535; F: 5'-ATTCTTGA CTCTCCCCACGA-3'; R:  
436 5'-TCTCCA ACTACGATTTTCGTTAATT-3'). These primers resulted in a PCR product of the  
437 expected size (195 bp) in all male samples screened (7/7), but not in any of the female samples  
438 (0/7), all of which were unrelated wild-caught individuals, confirming the male-specificity of this  
439 AGH allele.

440  
441 This AGH sequence could be either a male-specific duplication of the AGH gene, or a Y-linked  
442 allele that has diverged from an X-linked copy (in other words, gametologs). To distinguish  
443 between these possibilities, we examined the sequencing depth of these genes and of other  
444 putatively single-copy genes (identified in the BUSCO analysis) in male and female sequencing  
445 samples. If the male-specific AGH sequence is a gametolog of an X-linked sequence, we would  
446 expect the total sequencing depth of all AGH sequences (putative autosomal and putative Y-  
447 linked) to be the same in both the pooled male and pooled female samples, with the female  
448 sample having a higher average sequencing depth for the putative X-linked AGH sequences  
449 (since they would be homozygous for the X-linked gametologs, while males would be  
450 hemizygous for the X-linked gametologs). If, on the other hand, the male-specific AGH  
451 sequences are Y-linked duplicates, and not allelic to the other AGH sequences in our assembly,  
452 we would expect the shared autosomal AGH sequences to have similar sequencing depth in  
453 both male and female samples, and the combined sequencing depth of all AGH sequences

454 (putative autosomal and putative Y-linked) would be higher in the male sample. Our results  
455 were consistent with the latter scenario, suggesting these are Y-linked duplicates rather than  
456 gametologs (Figure 3). Note that sequencing depth of AGHY1 and AGHY2, though much lower  
457 in the female sample than in the male sample, is still non-zero in the female sample, probably  
458 because of ambiguously mapped reads due to high similarity between the Y-linked and  
459 autosomal copies.

460

461 Because the male-specific AGH sequences were found only in our Illumina data, we were  
462 unable to assemble them into long contigs, even after repeated attempts to assemble them  
463 individually with different assemblers and parameter values (not shown); all these contigs were  
464 ~600bp or less in length. Thus we are unable to determine whether these are complete  
465 duplicates of the whole gene, or fragments. Nevertheless, a phylogenetic analysis suggests that  
466 one of the Y-linked duplicates is a copy of the other, rather than an independent duplication of  
467 an autosomal copy, and based on branch lengths they are as divergent from one another as  
468 AGH orthologs in different species (Figure 3). In addition, these Y-linked copies seem to lack an  
469 intron that is present in the autosomal copies (Figure 4), suggesting they may have originated  
470 via retrotransposition.

471

472 We also find some evidence of additional autosomal duplicates of the androgenic gland  
473 hormone (AGH) gene. Two contigs in the full assembly contained annotated transcripts with at  
474 least partial homology to the expressed transcript identified as the AGH sequence, and a third  
475 contained no annotated genes but still showed high sequence similarity to AGH in BLAST  
476 searches. However, not all of the annotated exons in the first two copies matched the expressed  
477 transcript, and there were unannotated portions of the same contigs that did show sequence  
478 similarity to the transcript (Figure 4). Moreover, some of the matching portions of the assembled  
479 contigs had less than 90% sequence identity to the expressed transcript, and analysis of the

480 sequencing depth of these regions reveals that one has very low coverage, suggesting it may  
481 be an assembly artifact (see below). Thus, we cannot rule out the possibility that some of these  
482 possible autosomal duplicates represent assembly and/or annotation artifacts. If they are real,  
483 these autosomal duplicates appear to be specific to *Trachelipus*, occurring after its divergence  
484 from *Porcellio* (Figure 3), but they may still be nonfunctional.

485

## 486 **Discussion**

487

### 488 Possible sex chromosome polymorphism and recent transition to XY sex chromosomes in 489 *Trachelipus rathkei*

490

491 We have shown that, at least in our upstate New York population, sex determination in the  
492 terrestrial isopod *Trachelipus rathkei* is based on an XX/XY sex chromosome system. Two  
493 independent lines of evidence support this finding: first, crosses between females and sex-  
494 reversed neo-males yielded all female offspring (Table 2), consistent with an XX/XY system but  
495 not a ZZ/ZW system (Becking et al. 2017); second, we have identified PCR primers that only  
496 amplify a product in male samples, indicating the presence of a male-specific genomic region,  
497 i.e., a Y chromosome.

498

499 Our findings run counter to a previously published study showing evidence of female  
500 heterogamety in this species based on cytogenetics; in that study, female germ cells contained  
501 one set of unpaired chromosomes (presumably, the Z and W sex chromosomes), while male  
502 germ cells did not (Mittal & Pahwa 1980). There are multiple possible explanations for this  
503 contradiction. First, it is possible that the previous study incorrectly identified the species of  
504 study specimens, as no information on identification is given in the paper; however, *T. rathkei* is  
505 relatively easy to distinguish from other cosmopolitan terrestrial isopod species by its five pairs

506 of pleopodal “lungs” (most superficially similar species such as *Porcellio scaber* have only two  
507 pairs; (Hatchett 1947; Shultz 2018)). In addition, that study was published before feminizing  
508 *Wolbachia* was widely recognized in terrestrial isopods. It is therefore theoretically possible that  
509 the females used in that study carried an XY genotype but were feminized by *Wolbachia*, while  
510 the males in that study might have carried a YY genotype, perhaps resulting from a cross  
511 between an XY father and a sex-reversed XY or YY mother which failed to transmit *Wolbachia*  
512 (Becking et al. 2019). However, we found no evidence of sex-reversing *Wolbachia* in our *T.*  
513 *rathkei* population.

514  
515 Perhaps the most likely explanation is sex chromosome polymorphism. Indeed, this would not  
516 be unprecedented, as sex determination in terrestrial isopods is thought to evolve rapidly  
517 (Rigaud et al. 1997; Cordaux et al. 2011; Becking et al. 2017), and within-species sex  
518 chromosome polymorphisms are documented in a few other species. For instance, two  
519 subspecies of *Porcellio dilatatus*, *P. dilatatus dilatatus* and *P. dilatatus petiti* have XX/XY and  
520 ZZ/ZW systems, respectively (Juchault & Legrand 1964; Legrand et al. 1974; Becking et al.  
521 2017). In addition, multiple sex determining elements segregate in populations of the common  
522 pillbug *Armadillidium vulgare* (Juchault et al. 1992), including a novel W chromosome that  
523 resulted from the integration of an almost entire *Wolbachia* genome into the host genome  
524 (Leclercq et al. 2016). Outside terrestrial isopods, sex chromosome polymorphisms are also  
525 documented in a range of other arthropods and vertebrates (Rodrigues et al. 2013; Orzack et al.  
526 1980; Franco et al. 1982; Ogata et al. 2008). *T. rathkei* is probably non-native in North America  
527 where this study was conducted (Jass & Klausmeier 2000), as well as perhaps in India where  
528 the prior study on cytogenetics was done (Mittal & Pahwa 1980). Given its cosmopolitan  
529 distribution, and the fact that other terrestrial isopods have moderate to high levels of genetic  
530 diversity (Romiguier et al. 2014), it might not be especially surprising for *T. rathkei* to harbor

531 multiple polymorphic sex-determining loci. Hopefully future follow-up work can further  
532 characterize geographic variation in sex determination in this species.  
533  
534 Regardless of whether or not sex determination is polymorphic in *T. rathkei*, the sex  
535 chromosomes in this species are likely evolutionarily young because it is nested within a clade  
536 that mostly consists of ZZ/ZW species (Becking et al. 2019). In addition, the putative male-  
537 specific region of its genome is relatively small, displaying only moderate divergence from  
538 candidate gametologous sequences, similar to other terrestrial isopods examined so far (Chebbi  
539 et al. 2019; Becking et al. 2019). Given that we found genomic evidence of a past association  
540 with *Wolbachia* in this species and that infection by *Wolbachia* has been found in other *T.*  
541 *rathkei* populations (Cordaux et al. 2012), this observation is consistent with the hypothesis that  
542 transitions in sex determination mechanisms may be triggered by *Wolbachia* and other  
543 endosymbionts that manipulate host reproduction (Rigaud et al. 1997; Cordaux et al. 2011). If  
544 other populations of *T. rathkei* with different sex determination mechanisms can be identified, it  
545 may be possible to leverage this system to further study the mechanisms and selective forces  
546 influencing transitions in sex determination mechanisms. In addition, studies of sex  
547 determination in a phylogenetic context involving other members of the family Trachelipodidae  
548 would shed further light on the origins of the X and Y chromosomes in *T. rathkei*.

549

#### 550 Genome size, structure, and repetitive elements

551

552 The draft genome assembly of *T. rathkei* is especially large, at around 5.2 Gb, with  
553 approximately 29% GC content. The actual genome is likely to be even larger, given that ~25%  
554 of the BUSCO arthropod orthologs were missing in our assembly. By comparison, genomes of  
555 pillbugs in the genus *Armadillidium* tend to be smaller at around 1.2 - 2 Gb in size (Chebbi et al.  
556 2019; Becking et al. 2019), but other terrestrial isopods have genomes ranging to over 8 Gb

557 (Gregory 2020), and other crustacean relatives such as amphipods also have large genomes  
558 (Rees et al. 2007; Rivarola-Duarte et al. 2014; Kao et al. 2016), so *T. rathkei* is not out of the  
559 ordinary for this group.

560  
561 The *T. rathkei* genome contains a large proportion of repetitive elements, in particular  
562 transposable elements (Figure 1). The most common transposable element families are LINES,  
563 DNA elements, and LTRs, similar to *Armadillidium vulgare* and *A. nasatum* (Chebbi et al. 2019;  
564 Becking et al. 2019). The distribution of divergence values, with a single mode around 7-10%  
565 divergence, suggests that most repeat families expanded around the same time as in *A. vulgare*  
566 and *A. nasatum*; however, unlike in *A. vulgare*, *T. rathkei* shows no evidence of a second more  
567 recent burst in DNA element activity. Simple repeats also comprise a substantial portion of the  
568 genome; even manually looking through the assembled contigs reveals a high abundance of  
569 (TA)<sub>x</sub> repeats.

570

#### 571 *Wolbachia* insertions

572

573 We found many contigs with high similarity to the *Wolbachia* genome (Supplementary Table 3),  
574 even though we were unable to detect current *Wolbachia* infections in our population using  
575 PCR. This is not surprising given that *Wolbachia* is relatively common in terrestrial isopods and  
576 arthropods in general (Cordaux et al. 2012; Pascar & Chandler 2018; Medina et al. 2019), has  
577 been found in other populations of *T. rathkei* (Cordaux et al. 2012), and that horizontal transfers  
578 of *Wolbachia* DNA into host genomes is also common (Dunning Hotopp 2011). These  
579 *Wolbachia* insertions seem to be most closely related to strain *wCon* from *C. convexus*, which  
580 does not induce male-to-female sex reversal, but rather causes cytoplasmic incompatibility  
581 (Moret et al. 2001; Badawi et al. 2018). Consistent with this, we find that several copies of the  
582 cytoplasmic incompatibility genes *cifA* and *cifB* among these insertions in the *T. rathkei* genome

583 (Supplementary Figure 1). Thus, these past *T. rathkei* infections may have caused cytoplasmic  
584 incompatibility rather than host sex reversal, but it is possible that the same *Wolbachia* strain  
585 may have multiple effects on host phenotypes.

586

#### 587 Candidate sex-determining genes and repeated duplication of the AGH gene

588

589 Male differentiation in terrestrial isopods is controlled by the androgenic gland hormone, AGH.  
590 AGH is a peptide hormone similar in structure to insulin, and is secreted by the androgenic  
591 gland (Martin et al. 1999). AGH expression is sufficient to transform juvenile female isopods into  
592 fertile males (Martin et al. 1999). Presumably, in wild-type males, the primary sex-determining  
593 signal triggers the differentiation of the androgenic glands during development, which then  
594 secretes AGH. Interestingly, the draft genome of *T. rathkei* contains multiple AGH-like  
595 sequences. While some of these may be assembly artifacts, there is evidence three at least  
596 partial Y-linked sequences, of which one was confirmed by PCR to be male-specific. These  
597 duplications seem to be specific to *T. rathkei* (Figure 5), though other members of the genus  
598 *Trachelipus* or the family Trachelipodidae have yet to be examined. Consistent with this, a past  
599 study found no evidence of any expressed AGH duplications in other terrestrial isopod species  
600 except *Porcellio gallicus* (Cerveau et al. 2014).

601

602 In many other species, novel sex chromosomes have arisen via duplication of a sex-determining  
603 gene. For instance, duplicates of the vertebrate gene *Dmrt1* have evolved into master sex-  
604 determining signals on the W and Y chromosomes, respectively, in the frog *Xenopus laevis*  
605 (Yoshimoto et al. 2008) and the medaka *Oryzias latipes* (Nanda et al. 2002; Matsuda et al.  
606 2002, 2007), while a Y-linked duplicate of the anti-Müllerian hormone gene is a candidate  
607 master sex-determining gene in the teleost fish *Odontesthes hatcheri* (Hattori et al. 2012). The  
608 presence of Y-linked AGH copies in *T. rathkei*, and no other obvious open reading frames



609 homologous to known sex determination or sex differentiation genes, makes these genes  
610 obvious candidates for the master male-determining signal in *T. rathkei*. Unfortunately, we were  
611 unable to assemble full copies of these Y-linked AGH homologs because they only showed up  
612 in our Illumina data, not in our low-coverage long read data. Future deep sequencing using long  
613 reads should further clarify the molecular evolution of these genes. In addition, expression  
614 studies should determine which of these genes are expressed, in what tissues, and at what  
615 stages.

616  
617 If one of these AGH duplicates is indeed the master sex-determining signal in *T. rathkei*, this  
618 could support the idea of a transition in sex determination mechanisms triggered by *Wolbachia*  
619 and other reproductive endosymbionts (Rigaud et al. 1997; Cordaux et al. 2011). AGH may be a  
620 primary molecular target by which *Wolbachia* causes male-to-female sex reversal in isopod  
621 hosts, as injection with AGH does not cause female-to-male sex reversal in individuals infected  
622 by *Wolbachia* (Juchault & Legrand 1985; Cordaux & Gilbert 2017). Thus, *Wolbachia* may  
623 impose strong selection (via female-biased sex ratios) favoring duplication and divergence of  
624 the AGH gene to escape this sex reversal. The finding that *T. rathkei* may have historically been  
625 infected by a *Wolbachia* strain causing cytoplasmic incompatibility does not necessarily negate  
626 this finding, as the same *Wolbachia* strain can have multiple effects on host phenotypes.

## 627 628 Conclusions

629  
630 We have shown that the terrestrial isopod *Trachelipus rathkei* uses an XX/XY sex chromosome  
631 system, at least in upstate New York, in contrast to a past cytogenetic study suggesting a  
632 ZZ/ZW mechanism (Mittal & Pahwa 1980). In line with this, whole-genome sequencing and  
633 follow-up PCRs demonstrate the existence of male-specific, Y-linked copies of the androgenic  
634 gland hormone gene in this species. These findings highlight the role of gene duplication in the

635 evolution of sex chromosomes and support the possibility that reproductive endosymbionts like

636 *Wolbachia* may favor evolutionary transitions in host sex determination mechanisms.

637

638

639

640 **Acknowledgments**

641

642 This work was funded by National Science Foundation grant NSF-DEB 1453298 to CHC.

643

644 **Table 1.** *Trachelipus rathkei* DNA samples used for genomic sequencing.

| Sample name | Sex | Notes                              | Platform/<br>read length | Total data<br>(Gb) | Ref.                                 | Accession<br>Number |
|-------------|-----|------------------------------------|--------------------------|--------------------|--------------------------------------|---------------------|
| M-pool      | M   | Pool of three brothers, lab-reared | Illumina,<br>2x100       | 191.6              | This study                           | SRR11797365         |
| F-pool      | F   | Pool of three sisters, lab-reared  | Illumina,<br>2x100       | 191.9              | This study                           | SRR11797364         |
| M2          | M   | One male, lab-reared               | Illumina,<br>2x250       | 22.3               | This study                           | SRR11797360         |
| M5          | M   | One male, lab-reared               | Illumina,<br>2x250       | 20.6               | This study                           | SRR11797359         |
| M6          | M   | One male, lab-reared               | Illumina,<br>2x250       | 23.6               | This study                           | SRR11797358         |
| F3          | F   | One female, lab-reared             | Illumina,<br>2x250       | 131.5              | This study                           | SRR11797357         |
| F4          | F   | One female, lab-reared             | Illumina,<br>2x250       | 26.8               | This study                           | SRR11797356         |
| Wild-M      | M   | One male, wild-caught              | Illumina,<br>2x100       | 14.1               | (Chandler et al. 2015)               | SRR4000567          |
| Wild-F      | F   | One female, wild-caught            | Illumina,<br>2x100       | 14.4               | (Chandler et al. 2015)               | SRR4000573          |
| PB-F1       | F   | Pool of three sisters, lab-reared  | PacBio                   | 22.2               | This study;<br>(Peccoud et al. 2017) | SRR11797355         |
| PB-F2       | F   | Pool of three sisters, lab-reared  | PacBio                   | 1.3                | This study;<br>(Peccoud et al. 2017) | SRR11797354         |
| PB-M        | M   | Pool of three brothers, lab-reared | PacBio                   | 3.9                | This study;<br>(Peccoud et al. 2017) | SRR11797353         |
| ONT-F       | F   | One female                         | ONT                      | 0.4                | This study                           | SRR11797363         |
| ONT-M1      | M   | One male                           | ONT                      | 3.9                | This study                           | SRR11797362         |
| ONT-M2      | M   | One male                           | ONT                      | 3.3                | This study                           | SRR11797361         |

645

646

647 **Table 2.** Sex ratios from crosses between putative neo-males (juvenile females implanted with  
 648 an androgenic gland) and females.  $p$  gives the probability of the observed or a more extreme  
 649 result (pooling the data for each neo-male) under a balanced sex ratio (i.e., assuming each  
 650 individual offspring has an equal probability of being male or female).  
 651

| Neo-male | Female | Number of female offspring | Number of male offspring | $p$                   |
|----------|--------|----------------------------|--------------------------|-----------------------|
| D-4-7    | 1      | 23                         | 0                        | $5.7 \times 10^{-14}$ |
|          | 2      | 14                         | 0                        |                       |
|          | 3      | 7                          | 0                        |                       |
| G-4-22   | 1      | 16                         | 8                        | 0.13                  |
|          | 2      | 17                         | 14                       |                       |
|          | 3      | 13                         | 13                       |                       |
| F-4-9    | 1      | 36                         | 0                        | $1.7 \times 10^{-18}$ |
|          | 2      | 23                         | 0                        |                       |
| 10-8     | 1      | 24                         | 35                       | 0.19                  |
|          | 2      | 40                         | 40                       |                       |
| AGS169-2 | 1      | 45                         | 0                        | $2.1 \times 10^{-25}$ |
|          | 2      | 37                         | 0                        |                       |

652

653

654 **Table 3.** Assembly statistics for the *T. rathkei* draft genome.

|                        |                                               |
|------------------------|-----------------------------------------------|
| Total length           | 5,181,251,014 bp                              |
| Number of contigs      | 421,784                                       |
| N50                    | 39,761 bp                                     |
| GC content             | 29.0%                                         |
| Complete BUSCO genes   | 533 single copy (51.9%); 39 duplicated (3.7%) |
| Fragmented BUSCO genes | 203 (19.0%)                                   |
| Missing BUSCO genes    | 271 (25.4%)                                   |

655

656

657 **Figure Legends**

658

659 **Figure 1.** Distribution of divergence levels for repetitive elements in the *Trachelipus rathkei*  
660 genome.

661

662 **Figure 2.** Phylogenetic tree showing the position of candidate horizontally transferred  
663 *Wolbachia* segments in the *Trachelipus rathkei* genome. Numbers by nodes indicate bootstrap  
664 support. The tree was generated by concatenating all candidate *Wolbachia* insertions in *T.*  
665 *rathkei* longer than 1000 bp, along with the best-matching regions in the reference *Wolbachia*  
666 genomes, aligning with MUSCLE v. 3.8.31 (Edgar 2004), filtering alignments with trimal v.  
667 1.2rev59 (Capella-Gutiérrez et al. 2009), selecting a model using ModelTest-NG v. 0.1.6  
668 (Darriba et al. 2020), and running the analysis in RAxML-NG v. 0.9.0 (Stamatakis 2014) with  
669 100 bootstrap replicates.

670

671 **Figure 3.** Distribution of sequencing depth for single-copy BUSCO genes in male and female  
672 Illumina sequencing datasets (M-pool and F-pool). Labeled dots indicate the sequencing depth  
673 for the different AGH copies in each sample.

674

675 **Figure 4.** Possible duplicates of the androgenic gland hormone gene in the *Trachelipus rathkei*  
676 genome. The green bars represent the sequence of the expressed AGH sequence, assembled  
677 from previously available transcriptome data. Gray bars represent contigs in the draft genome  
678 assembly, and the pink bars on contigs represent annotated exons. Purple segments  
679 connecting portions of the transcript to portions of contigs represent BLAST hits. The  
680 incongruence between annotated exons and BLAST matches between the transcript and  
681 contigs suggests the annotation still contains some errors.

682

683 **Figure 5.** Phylogenetic tree showing relationships among AGH sequences from terrestrial  
684 isopods. AGH2 and AGHY3 are missing from this phylogeny because those sequences were  
685 omitted because of their short length. The tree was generated using all AGH-like sequences  
686 from *T. rathkei* of at least 100 bp, along with reference AGH nucleotide sequences from other  
687 species, aligning them with MUSCLE v. 3.8.31 (Edgar 2004), selecting a model using  
688 ModelTest-NG v. 0.1.6 (Darriba et al. 2020), and running the analysis in RAxML-NG v. 0.9.0  
689 (Stamatakis 2014) with 100 bootstrap replicates.

690

691

692

693



694 **References**

695

696 Badawi M, Moumen B, Giraud I, Grève P, Cordaux R. 2018. Investigating the molecular genetic  
697 basis of cytoplasmic sex determination caused by Wolbachia endosymbionts in terrestrial  
698 isopods. *Genes*. 9:290. doi: 10.3390/genes9060290.

699 Bankevich A et al. 2012. SPAdes: A New Genome Assembly Algorithm and Its Applications to  
700 Single-Cell Sequencing. *Journal of Computational Biology*. 19:455–477. doi:  
701 10.1089/cmb.2012.0021.

702 Bao Z, Eddy SR. 2002. Automated de novo identification of repeat sequence families in  
703 sequenced genomes. *Genome Res*. 12:1269–1276. doi: 10.1101/gr.88502.

704 Becking T et al. 2017. Diversity and evolution of sex determination systems in terrestrial  
705 isopods. *Sci Rep*. 7:1084. doi: 10.1038/s41598-017-01195-4.

706 Becking T et al. 2019. Sex chromosomes control vertical transmission of feminizing Wolbachia  
707 symbionts in an isopod. *PLOS Biology*. 17:e3000438. doi: 10.1371/journal.pbio.3000438.

708 Beckmann JF, Ronau JA, Hochstrasser M. 2017. A Wolbachia deubiquitylating enzyme induces  
709 cytoplasmic incompatibility. *Nat Microbiol*. 2:17007. doi: 10.1038/nmicrobiol.2017.7.

710 Benson G. 1999. Tandem repeats finder: a program to analyze DNA sequences. *Nucleic Acids*  
711 *Res*. 27:573–580. doi: 10.1093/nar/27.2.573.

712 Bergero R, Charlesworth D. 2009. The evolution of restricted recombination in sex  
713 chromosomes. *Trends in Ecology & Evolution*. 24:94–102. doi: 10.1016/j.tree.2008.09.010.

714 Blaser O, Grossen C, Neuenschwander S, Perrin N. 2013. Sex-chromosome turnovers induced  
715 by deleterious mutation load. *Evolution*. 67:635–645. doi: 10.1111/j.1558-5646.2012.01810.x.

716 Blaser O, Neuenschwander S, Perrin N. 2014. Sex-Chromosome Turnovers: The Hot-Potato  
717 Model. *The American Naturalist*. 183:140–146. doi: 10.1086/674026.

718 Bolger AM, Lohse M, Usadel B. 2014. Trimmomatic: a flexible trimmer for Illumina sequence  
719 data. *Bioinformatics*. 30:2114–2120. doi: 10.1093/bioinformatics/btu170.

720 Bouchon D, Rigaud T, Juchault P. 1998. Evidence for widespread Wolbachia infection in isopod  
721 crustaceans: molecular identification and host feminization. *Proceedings of the Royal Society of*  
722 *London. Series B: Biological Sciences*. 265:1081–1090. doi: 10.1098/rspb.1998.0402.

723 Braig HR, Zhou W, Dobson SL, O'Neill SL. 1998. Cloning and Characterization of a Gene  
724 Encoding the Major Surface Protein of the Bacterial Endosymbiont Wolbachia pipientis. *J*  
725 *Bacteriol*. 180:2373–2378.

726 Bryant DM et al. 2017. A Tissue-Mapped Axolotl De Novo Transcriptome Enables Identification  
727 of Limb Regeneration Factors. *Cell Reports*. 18:762–776. doi: 10.1016/j.celrep.2016.12.063.

- 728 Buchfink B, Xie C, Huson DH. 2015. Fast and sensitive protein alignment using DIAMOND.  
729 Nature Methods. 12:59–60. doi: 10.1038/nmeth.3176.
- 730 Bushnell B, Rood J, Singer E. 2017. BBMerge – Accurate paired shotgun read merging via  
731 overlap. PLOS ONE. 12:e0185056. doi: 10.1371/journal.pone.0185056.
- 732 Cantarel BL et al. 2008. MAKER: An easy-to-use annotation pipeline designed for emerging  
733 model organism genomes. Genome Res. 18:188–196. doi: 10.1101/gr.6743907.
- 734 Capella-Gutiérrez S, Silla-Martínez JM, Gabaldón T. 2009. trimAl: a tool for automated  
735 alignment trimming in large-scale phylogenetic analyses. Bioinformatics. 25:1972–1973. doi:  
736 10.1093/bioinformatics/btp348.
- 737 Cerveau N, Bouchon D, Bergès T, Grève P. 2014. Molecular evolution of the androgenic  
738 hormone in terrestrial isopods. Gene. 540:71–77. doi: 10.1016/j.gene.2014.02.024.
- 739 Chandler CH, Badawi M, Moumen B, Grève P, Cordaux R. 2015. Multiple Conserved  
740 Heteroplasmic Sites in tRNA Genes in the Mitochondrial Genomes of Terrestrial Isopods  
741 (Oniscidea). G3: Genes, Genomes, Genetics. 5:1317–1322. doi: 10.1534/g3.115.018283.
- 742 Chandler JC, Elizur A, Ventura T. 2018. The decapod researcher's guide to the galaxy of sex  
743 determination. Hydrobiologia. 825:61–80. doi: 10.1007/s10750-017-3452-4.
- 744 Chandler JC, Fitzgibbon QP, Smith G, Elizur A, Ventura T. 2017. Y-linked iDmrt1 paralogue  
745 (iDMY) in the Eastern spiny lobster, *Sagmariasus verreauxi*: The first invertebrate sex-linked  
746 Dmrt. Developmental Biology. 430:337–345. doi: 10.1016/j.ydbio.2017.08.031.
- 747 Charlesworth B, Charlesworth D. 2000. The degeneration of Y chromosomes Charlesworth, B.  
748 & Harvey, PH, editors. Phil. Trans. R. Soc. Lond. B. 355:1563–1572. doi:  
749 10.1098/rstb.2000.0717.
- 750 Charlesworth D, Charlesworth B, Marais G. 2005. Steps in the evolution of heteromorphic sex  
751 chromosomes. Heredity. 95:118–128. doi: 10.1038/sj.hdy.6800697.
- 752 Chebbi MA et al. 2019. The Genome of *Armadillidium vulgare* (Crustacea, Isopoda) Provides  
753 Insights into Sex Chromosome Evolution in the Context of Cytoplasmic Sex Determination. Mol  
754 Biol Evol. 36:727–741. doi: 10.1093/molbev/msz010.
- 755 Chevreux B, Wetter T, Suhai S, others. 1999. Genome sequence assembly using trace signals  
756 and additional sequence information. In: German conference on bioinformatics. Vol. 99 Citeseer  
757 pp. 45–56.
- 758 Cioffi MB, Liehr T, Trifonov V, Molina WF, Bertollo L a. C. 2013. Independent Sex Chromosome  
759 Evolution in Lower Vertebrates: A Molecular Cytogenetic Overview in the Erythrinidae Fish  
760 Family. CGR. 141:186–194. doi: 10.1159/000354039.
- 761 Conover DO, Kynard BE. 1981. Environmental Sex Determination: Interaction of Temperature  
762 and Genotype in a Fish. Science. 213:577–579. doi: 10.1126/science.213.4507.577.
- 763 Cordaux R et al. 2012. Widespread *Wolbachia* infection in terrestrial isopods and other  
764 crustaceans. Zookeys. 123–131. doi: 10.3897/zookeys.176.2284.

- 765 Cordaux R, Bouchon D, Grève P. 2011. The impact of endosymbionts on the evolution of host  
766 sex-determination mechanisms. *Trends in Genetics*. 27:332–341. doi:  
767 10.1016/j.tig.2011.05.002.
- 768 Cordaux R, Gilbert C. 2017. Evolutionary Significance of Wolbachia-to-Animal Horizontal Gene  
769 Transfer: Female Sex Determination and the f Element in the Isopod *Armadillidium vulgare*.  
770 *Genes (Basel)*. 8:186. doi: 10.3390/genes8070186.
- 771 Cordaux R, Michel-Salzat A, Frelon-Raimond M, Rigaud T, Bouchon D. 2004. Evidence for a  
772 new feminizing Wolbachia strain in the isopod *Armadillidium vulgare*: evolutionary implications.  
773 *Heredity*. 93:78–84. doi: 10.1038/sj.hdy.6800482.
- 774 Darriba D et al. 2020. ModelTest-NG: A New and Scalable Tool for the Selection of DNA and  
775 Protein Evolutionary Models Crandall, K, editor. *Molecular Biology and Evolution*. 37:291–294.  
776 doi: 10.1093/molbev/msz189.
- 777 van Doorn GS, Kirkpatrick M. 2007. Turnover of sex chromosomes induced by sexual conflict.  
778 *Nature*. 449:909–912. doi: 10.1038/nature06178.
- 779 Dunning Hotopp JC. 2011. Horizontal gene transfer between bacteria and animals. *Trends in*  
780 *Genetics*. 27:157–163. doi: 10.1016/j.tig.2011.01.005.
- 781 Edgar RC. 2004. MUSCLE: a multiple sequence alignment method with reduced time and  
782 space complexity. *BMC Bioinformatics*. 5:113. doi: 10.1186/1471-2105-5-113.
- 783 Emerson JJ, Kaessmann H, Betrán E, Long M. 2004. Extensive Gene Traffic on the Mammalian  
784 X Chromosome. *Science*. 303:537–540. doi: 10.1126/science.1090042.
- 785 Folmer O, Black MB, Hoeh WR, Lutz R, Vrijenhoek RC. 1994. DNA primers for amplification of  
786 mitochondrial cytochrome c oxidase subunit I from diverse metazoan invertebrates. *Molecular*  
787 *marine biology and biotechnology*. 3:294–299.
- 788 Franco MG, Rubini PG, Vecchi M. 1982. Sex-determinants and their distribution in various  
789 populations of *Musca domestica* L. of Western Europe. *Genetics Research*. 40:279–293. doi:  
790 10.1017/S0016672300019157.
- 791 Fussey GD. 1984. The distribution of the two forms of the woodlouse *Trichoniscus pusillus*  
792 Brandt (Isopoda: Oniscoidea) in the British Isles: a reassessment of geographic  
793 parthenogenesis. *Biol J Linn Soc*. 22:309–321. doi: 10.1111/j.1095-8312.1984.tb01681.x.
- 794 Gamble T, Geneva AJ, Glor RE, Zarkower D. 2014. *Anolis* Sex Chromosomes Are Derived from  
795 a Single Ancestral Pair. *Evolution*. 68:1027–1041. doi: 10.1111/evo.12328.
- 796 Gregory TR. 2020. Animal Genome Size Database. <http://www.genomesize.com/> (Accessed  
797 January 21, 2020).
- 798 Gurevich A, Saveliev V, Vyahhi N, Tesler G. 2013. QUASt: quality assessment tool for genome  
799 assemblies. *Bioinformatics*. 29:1072–1075. doi: 10.1093/bioinformatics/btt086.
- 800 Haas B, Papanicolaou A. 2016. TransDecoder (find coding regions within transcripts).  
801 <http://transdecoder.github.io>.

- 802 Hatchett SP. 1947. Biology of the Isopoda of Michigan. *Ecological Monographs*. 17:47–80. doi:  
803 10.2307/1948613.
- 804 Hattori RS et al. 2012. A Y-linked anti-Müllerian hormone duplication takes over a critical role in  
805 sex determination. *PNAS*. 109:2955–2959. doi: 10.1073/pnas.1018392109.
- 806 Heimpel GE, de Boer JG. 2008. Sex Determination in the Hymenoptera. *Annual Review of*  
807 *Entomology*. 53:209–230. doi: 10.1146/annurev.ento.53.103106.093441.
- 808 Janzen FJ, Phillips PC. 2006. Exploring the evolution of environmental sex determination,  
809 especially in reptiles. *Journal of Evolutionary Biology*. 19:1775–1784. doi: 10.1111/j.1420-  
810 9101.2006.01138.x.
- 811 Jass J, Klausmeier B. 2000. Endemics and Immigrants: North American Terrestrial Isopods  
812 (Isopoda, Oniscidea) North of Mexico. *Crustaceana*. 73:771–799.
- 813 Jeffries DL et al. 2018. A rapid rate of sex-chromosome turnover and non-random transitions in  
814 true frogs. *Nat Commun*. 9:4088. doi: 10.1038/s41467-018-06517-2.
- 815 Johnson C. 1986. Parthenogenetic Reproduction in the Philosciid Isopod, *Ocelloscia floridana*  
816 (Van Name, 1940). *Crustaceana*. 51:123–132.
- 817 Juchault P, Legrand J. 1964. Démonstration de l'homogamétie femelle par croisement de deux  
818 femelles génétiques chez les Oniscoïdes *Porcellio dilatatus* et *Helleria brevis-cornis*. *Comptes*  
819 *Rendus de l'Académie des Sciences de Paris*. 258:2685–2686.
- 820 Juchault P, Legrand JJ. 1985. Contribution à l'étude du mécanisme de l'état réfractaire à  
821 l'hormone androgène chez les *Armadillidium vulgare* Latr, (crustacé, isopode, oniscoïde)  
822 hébergeant une bactérie féminisante. *General and Comparative Endocrinology*. 60:463–467.  
823 doi: 10.1016/0016-6480(85)90082-6.
- 824 Juchault P, Rigaud T. 1995. Evidence for female heterogamety in two terrestrial crustaceans  
825 and the problem of sex chromosome evolution in isopods. *Heredity*. 75:466–471. doi:  
826 10.1038/hdy.1995.163.
- 827 Juchault P, Rigaud T, Mocquard J-P. 1992. Evolution of sex-determining mechanisms in a wild  
828 population of *Armadillidium vulgare* Latr. (Crustacea, Isopoda): competition between two  
829 feminizing parasitic sex factors. *Heredity*. 69:382–390. doi: 10.1038/hdy.1992.138.
- 830 Kageyama D, Nishimura G, Hoshizaki S, Ishikawa Y. 2002. Feminizing *Wolbachia* in an insect,  
831 *Ostrinia furnacalis* (Lepidoptera: Crambidae). *Heredity*. 88:444–449. doi:  
832 10.1038/sj.hdy.6800077.
- 833 Kao D et al. 2016. The genome of the crustacean *Parhyale hawaiiensis*, a model for animal  
834 development, regeneration, immunity and lignocellulose digestion VijayRaghavan, K, editor.  
835 *eLife*. 5:e20062. doi: 10.7554/eLife.20062.
- 836 Kokot M, Długosz M, Deorowicz S. 2017. KMC 3: counting and manipulating k-mer statistics.  
837 *Bioinformatics*. 33:2759–2761. doi: 10.1093/bioinformatics/btx304.

- 838 Korf I. 2004. Gene finding in novel genomes. *BMC Bioinformatics*. 5:59. doi: 10.1186/1471-  
839 2105-5-59.
- 840 Laetsch DR, Blaxter ML. 2017. BlobTools: Interrogation of genome assemblies. *F1000Res*.  
841 6:1287. doi: 10.12688/f1000research.12232.1.
- 842 Leclercq S et al. 2016. Birth of a W sex chromosome by horizontal transfer of Wolbachia  
843 bacterial symbiont genome. *Proc Natl Acad Sci U S A*. 113:15036–15041. doi:  
844 10.1073/pnas.1608979113.
- 845 Legrand J, Juchault P, Artault J, Mocquard J, Picaud J. 1974. Le statut systématique de la  
846 «forme» petiti Vandell de *Porcellio dilatatus* Brandt, récoltée à l'île Saint-Honorat (Alpes-  
847 Maritimes). Critères morphologiques, génétiques et physiologiques. *Bull. Soc. Zool. Fr.* 99:461–  
848 471.
- 849 LePage DP et al. 2017. Prophage WO genes recapitulate and enhance Wolbachia -induced  
850 cytoplasmic incompatibility. *Nature*. 543:243–247. doi: 10.1038/nature21391.
- 851 Li H. 2013. Aligning sequence reads, clone sequences and assembly contigs with BWA-MEM.  
852 arXiv:1303.3997 [q-bio]. <http://arxiv.org/abs/1303.3997> (Accessed April 27, 2020).
- 853 Lindsey ARI et al. 2018. Evolutionary Genetics of Cytoplasmic Incompatibility Genes *cifA* and  
854 *cifB* in Prophage WO of Wolbachia. *Genome Biol Evol*. 10:434–451. doi: 10.1093/gbe/evy012.
- 855 Martin G et al. 1999. The structure of a glycosylated protein hormone responsible for sex  
856 determination in the isopod, *Armadillidium vulgare*. *European Journal of Biochemistry*. 262:727–  
857 736. doi: 10.1046/j.1432-1327.1999.00442.x.
- 858 Matsuda M et al. 2007. DMY gene induces male development in genetically female (XX)  
859 medaka fish. *PNAS*. 104:3865–3870. doi: 10.1073/pnas.0611707104.
- 860 Matsuda M et al. 2002. DMY is a Y-specific DM-domain gene required for male development in  
861 the medaka fish. *Nature*. 417:559–563. doi: 10.1038/nature751.
- 862 Medina P, Russell SL, Corbett-Detig R. 2019. Deep data mining reveals variable abundance  
863 and distribution of microbial reproductive manipulators within and among diverse host species.  
864 bioRxiv. 679837. doi: 10.1101/679837.
- 865 Meisel RP et al. 2016. Is Multifactorial Sex Determination in the House Fly, *Musca domestica*  
866 (L.), Stable Over Time? *J Hered*. 107:615–625. doi: 10.1093/jhered/esw051.
- 867 Mittal OP, Pahwa S. 1980. Cytogenetical studies on two terrestrial isopods (Crustacea),  
868 *Philoscia lodnensis* Ramakrishna and *Porcellio rathkei* Brandt. *Cytobios*. 29:17–24.
- 869 Moret Y, Juchault P, Rigaud T. 2001. Wolbachia endosymbiont responsible for cytoplasmic  
870 incompatibility in a terrestrial crustacean: effects in natural and foreign hosts. *Heredity*. 86:325–  
871 332. doi: 10.1046/j.1365-2540.2001.00831.x.
- 872 Morgulis A et al. 2008. Database indexing for production MegaBLAST searches. *Bioinformatics*.  
873 24:1757–1764. doi: 10.1093/bioinformatics/btn322.

- 874 Myosho T, Takehana Y, Hamaguchi S, Sakaizumi M. 2015. Turnover of Sex Chromosomes in  
875 Celebensis Group Medaka Fishes. *G3: Genes, Genomes, Genetics*. 5:2685–2691. doi:  
876 10.1534/g3.115.021543.
- 877 Nanda I et al. 2002. A duplicated copy of DMRT1 in the sex-determining region of the Y  
878 chromosome of the medaka, *Oryzias latipes*. *PNAS*. 99:11778–11783. doi:  
879 10.1073/pnas.182314699.
- 880 Negri I, Pellicchia M, Mazzoglio P.J, Patetta A, Alma A. 2006. Feminizing Wolbachia in  
881 *Zyginidia pullula* (Insecta, Hemiptera), a leafhopper with an XX/X0 sex-determination system.  
882 *Proceedings of the Royal Society B: Biological Sciences*. 273:2409–2416. doi:  
883 10.1098/rspb.2006.3592.
- 884 Ogata M, Hasegawa Y, Ohtani H, Mineyama M, Miura I. 2008. The ZZ/ZW sex-determining  
885 mechanism originated twice and independently during evolution of the frog, *Rana rugosa*.  
886 *Heredity*. 100:92–99. doi: 10.1038/sj.hdy.6801068.
- 887 Orzack SH, Sohn JJ, Kallman KD, Levin SA, Johnston R. 1980. Maintenance of the Three Sex  
888 Chromosome Polymorphism in the Platyfish, *Xiphophorus maculatus*. *Evolution*. 34:663–672.  
889 doi: 10.2307/2408020.
- 890 Ospina-Álvarez N, Piferrer F. 2008. Temperature-Dependent Sex Determination in Fish  
891 Revisited: Prevalence, a Single Sex Ratio Response Pattern, and Possible Effects of Climate  
892 Change. *PLOS ONE*. 3:e2837. doi: 10.1371/journal.pone.0002837.
- 893 Pascar J, Chandler CH. 2018. A bioinformatics approach to identifying Wolbachia infections in  
894 arthropods. *PeerJ*. 6:e5486. doi: 10.7717/peerj.5486.
- 895 Peccoud J et al. 2017. Untangling Heteroplasmy, Structure, and Evolution of an Atypical  
896 Mitochondrial Genome by PacBio Sequencing. *Genetics*. 207:269–280. doi:  
897 10.1534/genetics.117.203380.
- 898 Pennell MW, Mank JE, Peichel CL. 2018. Transitions in sex determination and sex  
899 chromosomes across vertebrate species. *Mol Ecol*. 27:3950–3963. doi: 10.1111/mec.14540.
- 900 Pickup J, Ironside JE. 2018. Multiple origins of parasitic feminization: thelygeny and  
901 intersexuality in beach-hoppers are caused by paramyxid parasites, not microsporidia.  
902 *Parasitology*. 145:408–415. doi: 10.1017/S0031182017001597.
- 903 Potrzebowski L et al. 2008. Chromosomal Gene Movements Reflect the Recent Origin and  
904 Biology of Therian Sex Chromosomes. *PLOS Biology*. 6:e80. doi:  
905 10.1371/journal.pbio.0060080.
- 906 Price AL, Jones NC, Pevzner PA. 2005. De novo identification of repeat families in large  
907 genomes. *Bioinformatics*. 21:i351–i358. doi: 10.1093/bioinformatics/bti1018.
- 908 Prysycz LP, Gabaldón T. 2016. Redundans: an assembly pipeline for highly heterozygous  
909 genomes. *Nucleic Acids Res*. 44:e113–e113. doi: 10.1093/nar/gkw294.
- 910 Rees DJ, Dufresne F, Glémet H, Belzile C. 2007. Amphipod genome sizes: first estimates for  
911 Arctic species reveal genomic giants. *Genome*. 50:151–158. doi: 10.1139/G06-155.

- 912 Rice WR. 1996. Evolution of the Y Sex Chromosome in Animals. *BioScience*. 46:331–343. doi:  
913 10.2307/1312947.
- 914 Rigaud T, Juchault P, Mocquard J-P. 1997. The evolution of sex determination in isopod  
915 crustaceans. *BioEssays*. 19:409–416. doi: 10.1002/bies.950190508.
- 916 Rivarola-Duarte L et al. 2014. A first Glimpse at the genome of the Baikalian amphipod  
917 *Eulimnogammarus verrucosus*. *Journal of Experimental Zoology Part B: Molecular and*  
918 *Developmental Evolution*. 322:177–189. doi: 10.1002/jez.b.22560.
- 919 Rodrigues N, Betto-Colliard C, Jourdan-Pineau H, Perrin N. 2013. Within-population  
920 polymorphism of sex-determination systems in the common frog (*Rana temporaria*). *Journal of*  
921 *Evolutionary Biology*. 26:1569–1577. doi: 10.1111/jeb.12163.
- 922 Romiguier J et al. 2014. Comparative population genomics in animals uncovers the  
923 determinants of genetic diversity. *Nature*. 515:261–263. doi: 10.1038/nature13685.
- 924 Ross JA, Urton JR, Boland J, Shapiro MD, Peichel CL. 2009. Turnover of Sex Chromosomes in  
925 the Stickleback Fishes (*Gasterosteidae*). *PLOS Genetics*. 5:e1000391. doi:  
926 10.1371/journal.pgen.1000391.
- 927 Shultz JW. 2018. A guide to the identification of the terrestrial Isopoda of Maryland, U.S.A.  
928 (*Crustacea*). *ZooKeys*. 801:207–228. doi: 10.3897/zookeys.801.24146.
- 929 Simão FA, Waterhouse RM, Ioannidis P, Kriventseva EV, Zdobnov EM. 2015. BUSCO:  
930 assessing genome assembly and annotation completeness with single-copy orthologs.  
931 *Bioinformatics*. 31:3210–3212. doi: 10.1093/bioinformatics/btv351.
- 932 Stamatakis A. 2014. RAxML version 8: a tool for phylogenetic analysis and post-analysis of  
933 large phylogenies. *Bioinformatics*. 30:1312–1313. doi: 10.1093/bioinformatics/btu033.
- 934 Stanke M et al. 2006. AUGUSTUS: ab initio prediction of alternative transcripts. *Nucleic Acids*  
935 *Res*. 34:W435–W439. doi: 10.1093/nar/gkl200.
- 936 Sun LV et al. 2001. Determination of Wolbachia Genome Size by Pulsed-Field Gel  
937 Electrophoresis. *Journal of Bacteriology*. 183:2219–2225. doi: 10.1128/JB.183.7.2219-  
938 2225.2001.
- 939 Tarailo-Graovac M, Chen N. 2009. Using RepeatMasker to Identify Repetitive Elements in  
940 Genomic Sequences. *Current Protocols in Bioinformatics*. 25:4–10. doi:  
941 10.1002/0471250953.bi0410s25.
- 942 Terry RS, Smith JE, Dunn AM. 1998. Impact of a Novel, Feminising Microsporidium on its  
943 Crustacean Host. *Journal of Eukaryotic Microbiology*. 45:497–501. doi: 10.1111/j.1550-  
944 7408.1998.tb05106.x.
- 945 Tingley GA, Anderson RM. 1986. Environmental sex determination and density-dependent  
946 population regulation in the entomogenous nematode *Romanomermis culicivorax*. *Parasitology*.  
947 92:431–449. doi: 10.1017/S0031182000064192.

- 948 Traut W. 1994. Sex determination in the fly *Megaselia scalaris*, a model system for primary  
949 steps of sex chromosome evolution. *Genetics*. 136:1097–1104.
- 950 Untergasser A et al. 2012. Primer3—new capabilities and interfaces. *Nucleic Acids Res.*  
951 40:e115–e115. doi: 10.1093/nar/gks596.
- 952 Vandeputte M, Dupont-Nivet M, Chavanne H, Chatain B. 2007. A Polygenic Hypothesis for Sex  
953 Determination in the European Sea Bass *Dicentrarchus labrax*. *Genetics*. 176:1049–1057. doi:  
954 10.1534/genetics.107.072140.
- 955 Verhulst EC, Beukeboom LW, Zande L van de. 2010. Maternal Control of Haplodiploid Sex  
956 Determination in the Wasp *Nasonia*. *Science*. 328:620–623. doi: 10.1126/science.1185805.
- 957 Veyrunes F et al. 2008. Bird-like sex chromosomes of platypus imply recent origin of mammal  
958 sex chromosomes. *Genome Res*. 18:965–973. doi: 10.1101/gr.7101908.
- 959 Vicoso B, Bachtrog D. 2015. Numerous Transitions of Sex Chromosomes in Diptera. *PLOS*  
960 *Biology*. 13:e1002078. doi: 10.1371/journal.pbio.1002078.
- 961 Walker BJ et al. 2014. Pilon: An Integrated Tool for Comprehensive Microbial Variant Detection  
962 and Genome Assembly Improvement. *PLOS ONE*. 9:e112963. doi:  
963 10.1371/journal.pone.0112963.
- 964 Wang JR, Holt J, McMillan L, Jones CD. 2018. FMLRC: Hybrid long read error correction using  
965 an FM-index. *BMC Bioinformatics*. 19:50. doi: 10.1186/s12859-018-2051-3.
- 966 Werren John H., Zhang Wan, Guo Li Rong. 1995. Evolution and phylogeny of *Wolbachia*:  
967 reproductive parasites of arthropods. *Proceedings of the Royal Society of London. Series B:*  
968 *Biological Sciences*. 261:55–63. doi: 10.1098/rspb.1995.0117.
- 969 Ye C, Hill CM, Wu S, Ruan J, Ma Z. 2016. DBG2OLC: Efficient Assembly of Large Genomes  
970 Using Long Erroneous Reads of the Third Generation Sequencing Technologies. *Sci Rep*.  
971 6:31900. doi: 10.1038/srep31900.
- 972 Ye C, Ma Z (Sam). 2016. Sparc: a sparsity-based consensus algorithm for long erroneous  
973 sequencing reads. *PeerJ*. 4:e2016. doi: 10.7717/peerj.2016.
- 974 Ye C, Ma ZS, Cannon CH, Pop M, Yu DW. 2012. Exploiting sparseness in de novo genome  
975 assembly. *BMC Bioinformatics*. 13:S1. doi: 10.1186/1471-2105-13-S6-S1.
- 976 Yoshimoto S et al. 2008. A W-linked DM-domain gene, DM-W, participates in primary ovary  
977 development in *Xenopus laevis*. *Proceedings of the National Academy of Sciences*. 105:2469–  
978 2474. doi: 10.1073/pnas.0712244105.
- 979
- 980
- 981



982 **Figure 1**

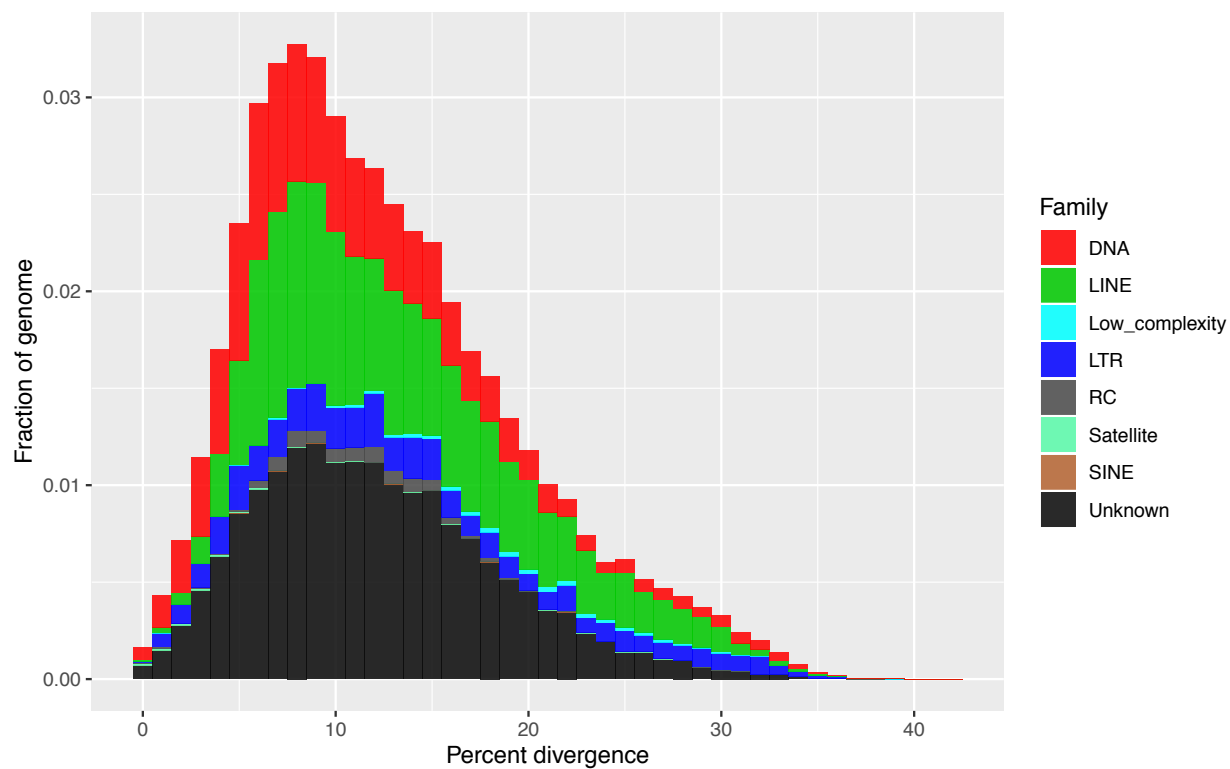

983

984

985 **Figure 2**

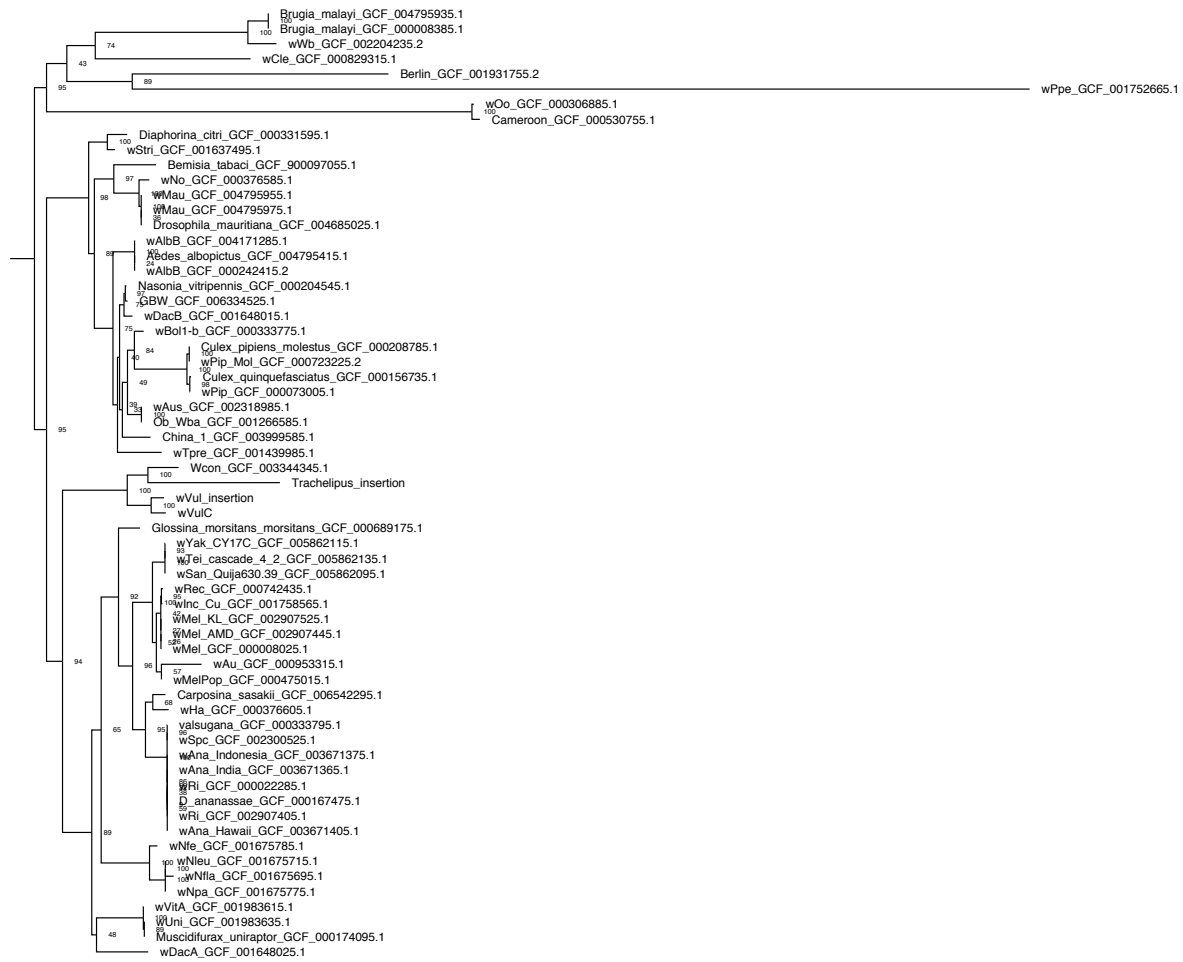

986

987

988 **Figure 3**

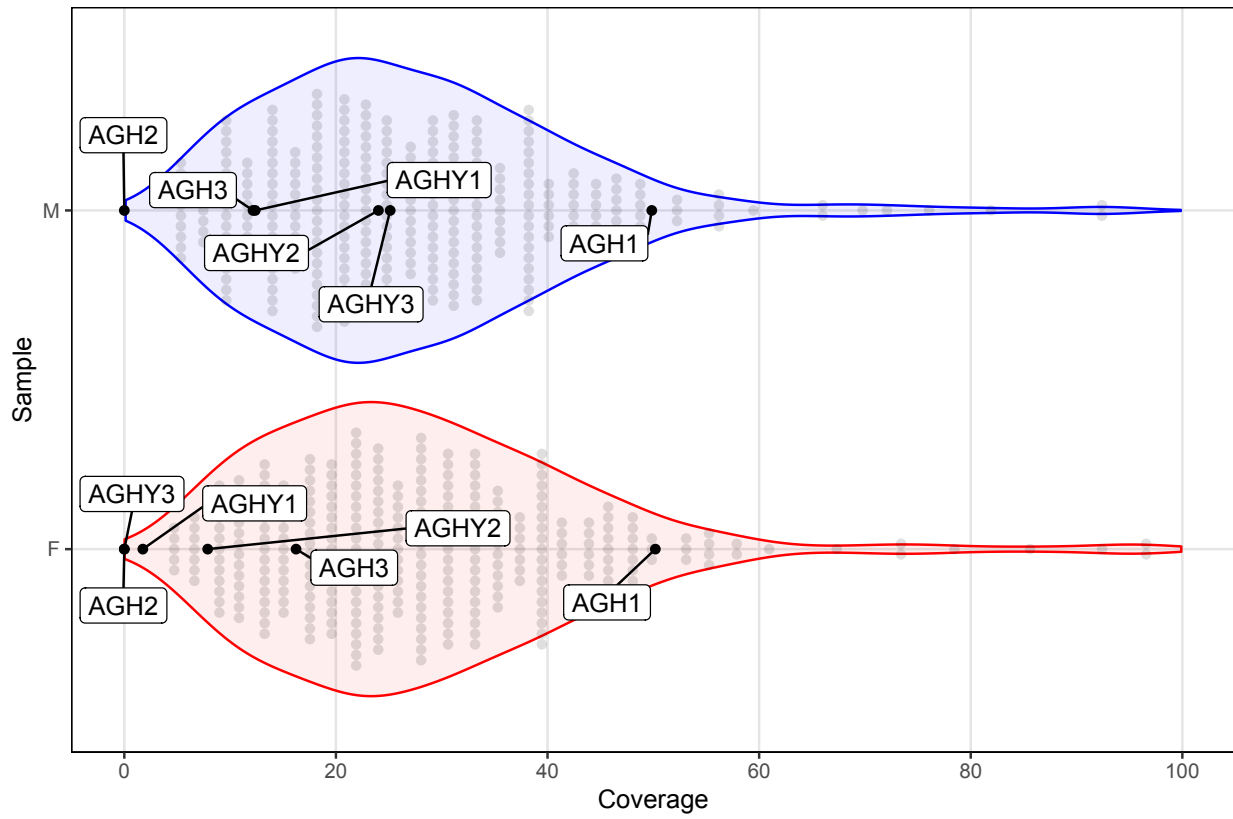

989

990

991 **Figure 4**

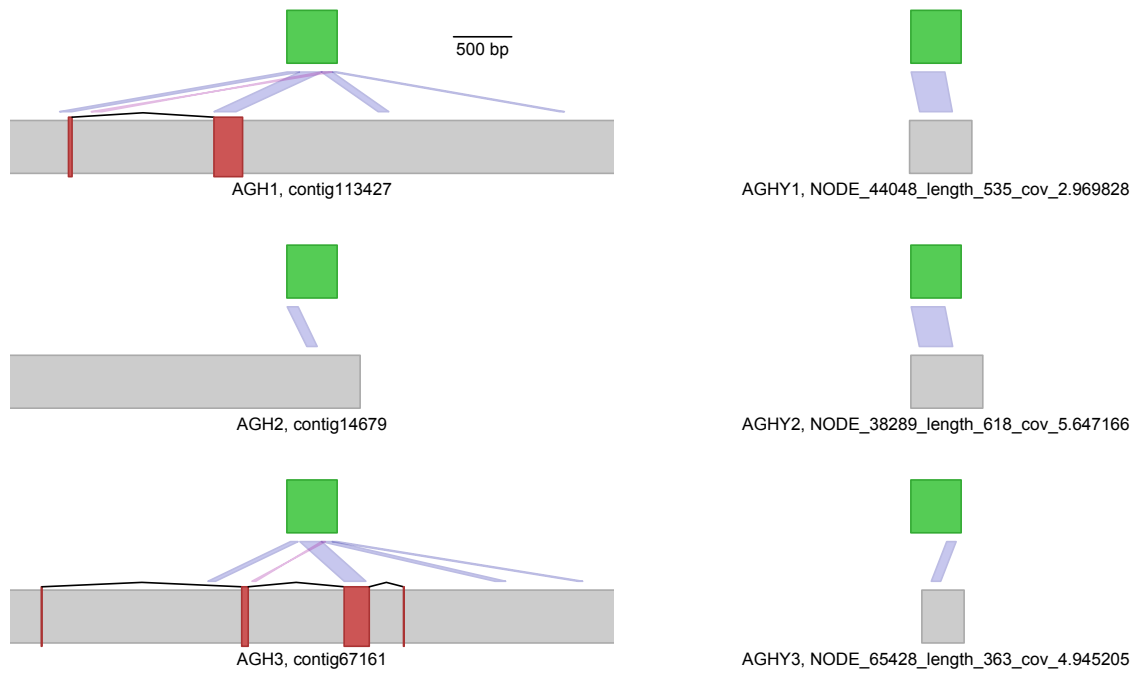

992

993

994 **Figure 5**

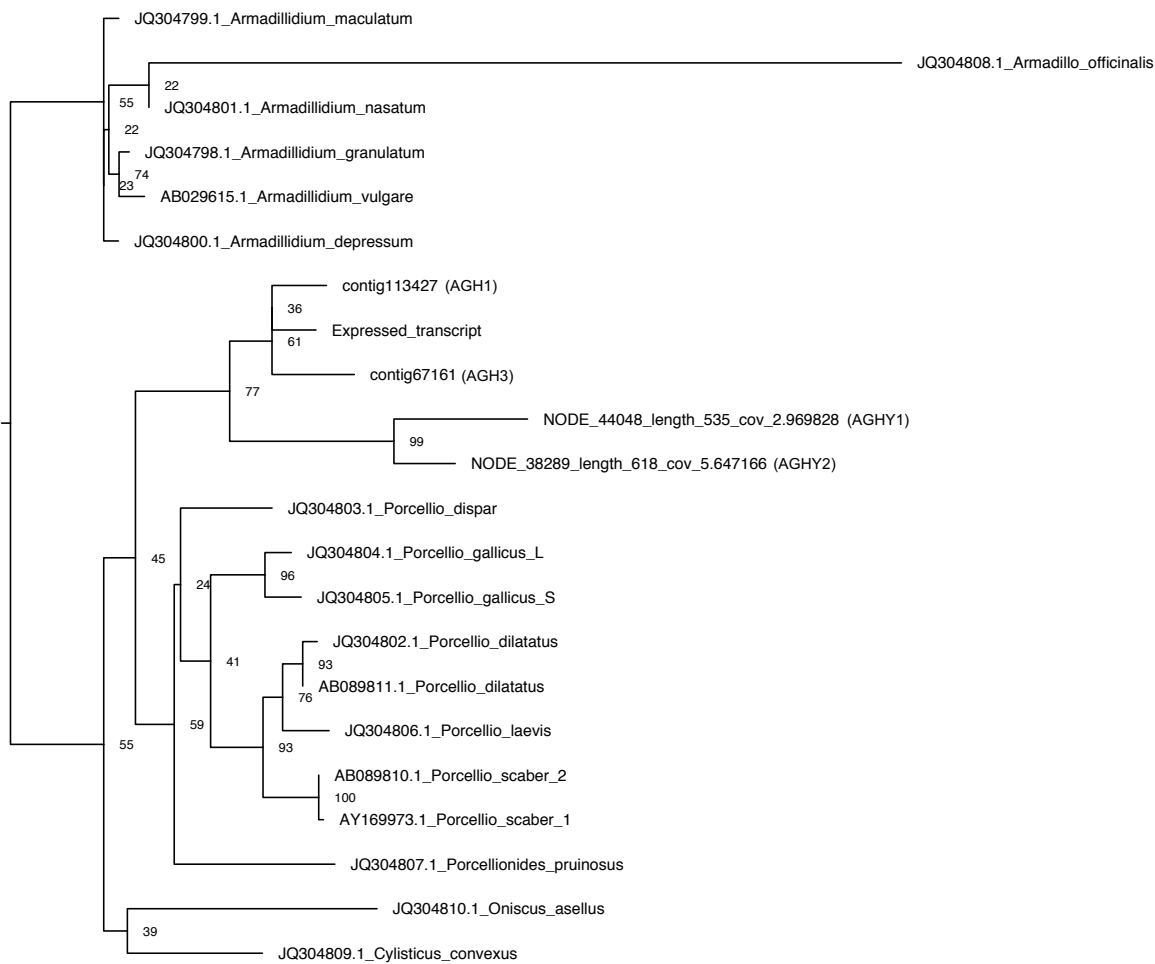

Source: https://www.biorxiv.org/content/10.1101/2020.05.18.102079v1.full.pdf
