# Supplementary material for: Evolutionary transition to XY sex chromosomes associated with Y-linked duplication of a male hormone gene in a terrestrial isopod
Source: bioRxiv or medRxiv preprint supplement (doi:10.1101/2020.05.18.102079), 2021-07-14

**Supplementary Figure 1.** Regions in the *Trachelipus rathkei* genome assembly matching the *Wolbachia* cytoplasmic incompatibility genes *cifA* and *cifB*. Black bars on top represent a contig in the *T. rathkei* assembly. Lines underneath represent BLAST hits against *cifA* and *cifB* from different *Wolbachia* genomes; numbers to the left and right indicate sequence coordinates (amino acids) of the endpoints of the matching regions of the *cifA* and *cifB* genes in the wCon genome (which has multiple copies of each gene).

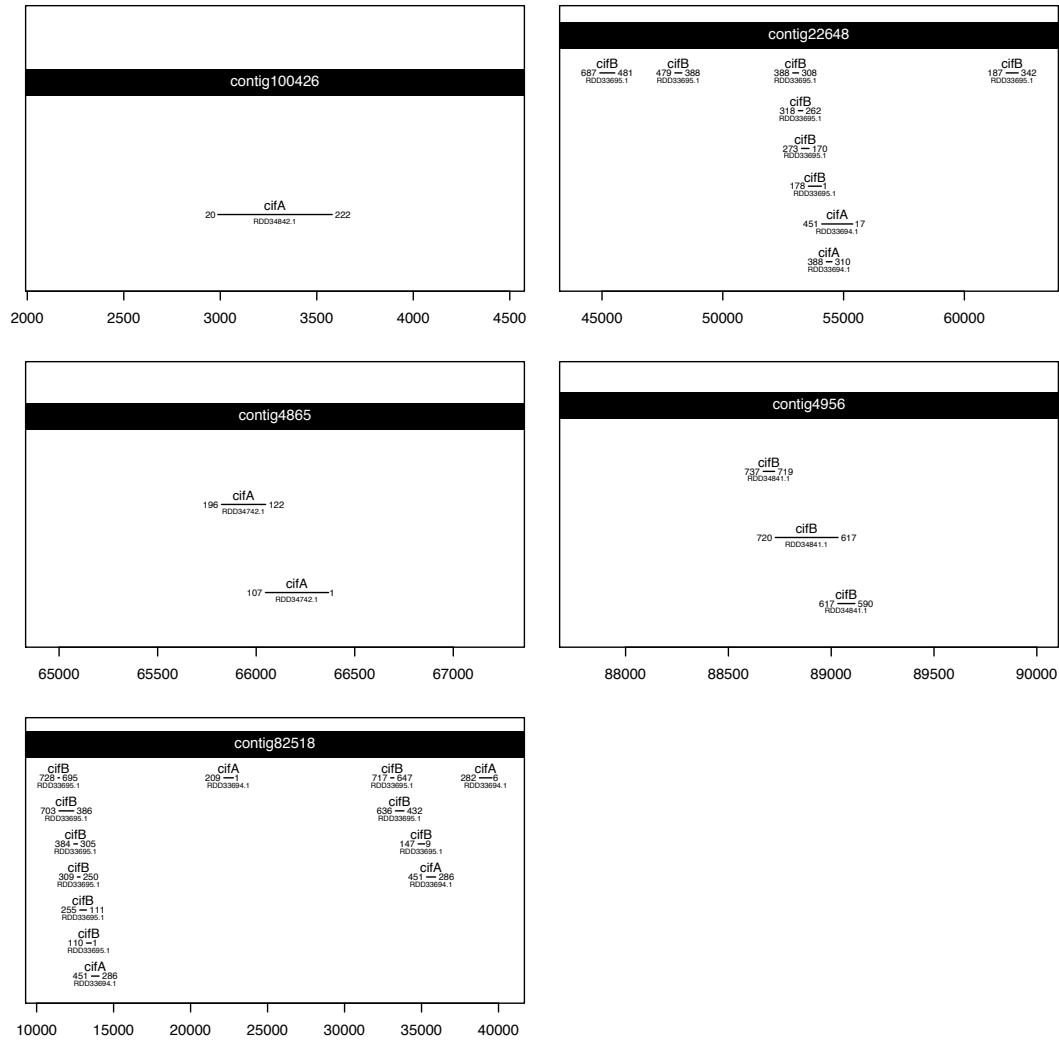

Supplement: Supplementary file [file media-1.pdf]
