# Supplementary material for: Evolutionary transition to XY sex chromosomes associated with Y-linked duplication of a male hormone gene in a terrestrial isopod
Source: bioRxiv or medRxiv preprint supplement (doi:10.1101/2020.05.18.102079), 2021-07-14
Supplement: Supplementary file [file media-2.pdf]

**Supplementary Table 1.** Assembly statistics for initial genome assemblies performed with only short-read data. k=61 was selected as the optimal short-read assembly for further hybrid assembly with long-read data using DBG2OLC.

|                           | k = 51        | k = 61        |
|---------------------------|---------------|---------------|
| # contigs (>= 0 bp)       | 62,285,342    | 53,534,813    |
| # contigs (>= 500 bp)     | 750,475       | 966,258       |
| # contigs (>= 1000 bp)    | 148,561       | 227,660       |
| # contigs (>= 5000 bp)    | 850           | 1088          |
| Total length (>= 0 bp)    | 5,689,084,525 | 5,960,525,287 |
| Total length (>= 500 bp)  | 626,371,545   | 846,993,489   |
| Total length (>= 1000 bp) | 224,744,531   | 347,268,680   |
| Total length (>= 5000 bp) | 7,240,744     | 7,187,453     |
| Largest contig (bp)       | 73,394        | 28,080        |
| GC (%)                    | 33.6          | 33.6          |
| N50 (bp)                  | 817           | 877           |

**Supplementary Table 2.** Sex ratios of *T. rathkei* broods reared in the lab. Wild-caught refers to a mated female captured in the wild and brought back to the lab to give birth. Only broods with at least 10 offspring are shown.

| Cross type  | Mother ID | Father ID | Brood number | Year born | Male | Female | Total Offspring | % Female |
|-------------|-----------|-----------|--------------|-----------|------|--------|-----------------|----------|
| Wild-caught | 8         | unknown   | 1            | 2016      | 14   | 12     | 26              | 46.2     |
| Wild-caught | 10        | unknown   | 1            | 2016      | 19   | 15     | 34              | 44.1     |
| Wild-caught | 11        | unknown   | 1            | 2016      | 11   | 11     | 22              | 50.0     |
| Wild-caught | 13        | unknown   | 1            | 2016      | 18   | 12     | 30              | 40.0     |
| Wild-caught | 14        | unknown   | 1            | 2016      | 26   | 15     | 41              | 36.6     |
| Wild-caught | 14        | unknown   | 2            | 2016      | 7    | 10     | 17              | 58.8     |
| Wild-caught | 17        | unknown   | 1            | 2016      | 23   | 28     | 51              | 54.9     |
| Wild-caught | 17        | unknown   | 2            | 2016      | 8    | 10     | 18              | 55.6     |
| Wild-caught | 18        | unknown   | 1            | 2016      | 6    | 12     | 18              | 66.7     |
| Wild-caught | 19        | unknown   | 1            | 2016      | 15   | 13     | 28              | 46.4     |
| Wild-caught | 20        | unknown   | 1            | 2016      | 7    | 6      | 13              | 46.2     |
| Wild-caught | 21        | unknown   | 1            | 2016      | 20   | 18     | 38              | 47.4     |
| Wild-caught | 21        | unknown   | 2            | 2016      | 4    | 8      | 12              | 66.7     |
| Wild-caught | 22        | unknown   | 1            | 2016      | 17   | 14     | 31              | 45.2     |
| Wild-caught | 25        | unknown   | 1            | 2016      | 19   | 12     | 31              | 38.7     |
| Wild-caught | 26        | unknown   | 1            | 2016      | 9    | 42     | 51              | 82.4     |
| Wild-caught | 26        | unknown   | 2            | 2016      | 2    | 13     | 15              | 86.7     |
| Wild-caught | 28        | unknown   | 1            | 2016      | 12   | 16     | 28              | 57.1     |
| Wild-caught | 28        | unknown   | 2            | 2016      | 8    | 5      | 13              | 38.5     |
| Wild-caught | 29        | unknown   | 1            | 2016      | 12   | 20     | 32              | 62.5     |
| Wild-caught | 29        | unknown   | 2            | 2016      | 8    | 9      | 17              | 52.9     |
| Wild-caught | 30        | unknown   | 1            | 2016      | 20   | 26     | 46              | 56.5     |
| Wild-caught | 32        | unknown   | 1            | 2016      | 5    | 16     | 21              | 76.2     |
| Wild-caught | 34        | unknown   | 1            | 2016      | 12   | 11     | 23              | 47.8     |
| Wild-caught | 35        | unknown   | 1            | 2016      | 5    | 5      | 10              | 50.0     |
| Wild-caught | 39        | unknown   | 1            | 2016      | 6    | 5      | 11              | 45.5     |
| Wild-caught | 42        | unknown   | 1            | 2016      | 8    | 10     | 18              | 55.6     |
| Wild-caught | 45        | unknown   | 1            | 2016      | 3    | 7      | 10              | 70.0     |
| Wild-caught | 46        | unknown   | 1            | 2016      | 17   | 24     | 41              | 58.5     |
| Wild-caught | 47        | unknown   | 1            | 2016      | 15   | 8      | 23              | 34.8     |

|             |     |         |      |      |    |    |    |      |
|-------------|-----|---------|------|------|----|----|----|------|
| Wild-caught | 47  | unknown | 2    | 2017 | 33 | 30 | 63 | 47.6 |
| Wild-caught | 47  | unknown | 3    | 2017 | 27 | 20 | 47 | 42.6 |
| Wild-caught | 48  | unknown | 2    | 2017 | 23 | 25 | 48 | 52.1 |
| Wild-caught | 77  | unknown | 1    | 2016 | 6  | 8  | 14 | 57.1 |
| Wild-caught | 83  | unknown | 1    | 2016 | 6  | 4  | 10 | 40.0 |
| Wild-caught | 83  | unknown | 2    | 2017 | 15 | 20 | 35 | 57.1 |
| Wild-caught | 89  | unknown | 1    | 2016 | 12 | 7  | 19 | 36.8 |
| Wild-caught | 106 | unknown | 1    | 2016 | 8  | 10 | 18 | 55.6 |
| Wild-caught | 107 | unknown | 1    | 2016 | 5  | 5  | 10 | 50.0 |
| Wild-caught | 115 | unknown | 1    | 2016 | 8  | 4  | 12 | 33.3 |
| Wild-caught | 116 | unknown | 1    | 2016 | 7  | 9  | 16 | 56.3 |
| Wild-caught | 119 | unknown | 1    | 2017 | 24 | 26 | 50 | 52.0 |
| Wild-caught | 121 | unknown | 1    | 2016 | 11 | 8  | 19 | 42.1 |
| Wild-caught | 122 | unknown | 1    | 2016 | 6  | 12 | 18 | 66.7 |
| Wild-caught | 123 | unknown | 1    | 2016 | 7  | 5  | 12 | 41.7 |
| Wild-caught | 128 | unknown | 1    | 2016 | 3  | 8  | 11 | 72.7 |
| Wild-caught | 128 | unknown | 2    | 2017 | 24 | 17 | 41 | 41.5 |
| Wild-caught | 130 | unknown | 1    | 2016 | 11 | 2  | 13 | 15.4 |
| Wild-caught | 132 | unknown | 1    | 2016 | 9  | 12 | 21 | 57.1 |
| Wild-caught | 136 | unknown | 1    | 2016 | 5  | 6  | 11 | 54.5 |
| Wild-caught | 151 | unknown | 1    | 2017 | 23 | 25 | 48 | 52.1 |
| Wild-caught | 161 | unknown | 1    | 2017 | 15 | 15 | 30 | 50.0 |
| Wild-caught | 161 | unknown | 2    | 2017 | 17 | 24 | 41 | 58.5 |
| Wild-caught | 163 | unknown | 1    | 2016 | 23 | 14 | 37 | 37.8 |
| Wild-caught | 163 | unknown | 2    | 2017 | 28 | 47 | 75 | 62.7 |
| Wild-caught | 163 | unknown | 3    | 2017 | 4  | 18 | 22 | 81.8 |
| Wild-caught | 165 | unknown | 1    | 2017 | 21 | 24 | 45 | 53.3 |
| Wild-caught | 165 | unknown | 2    | 2017 | 28 | 16 | 44 | 36.4 |
| Wild-caught | 167 | unknown | 1    | 2016 | 22 | 21 | 43 | 48.8 |
| Wild-caught | 167 | unknown | 2    | 2017 | 7  | 5  | 12 | 41.7 |
| Wild-caught | 168 | unknown | 1    | 2017 | 4  | 9  | 13 | 69.2 |
| Wild-caught | 169 | unknown | 1    | 2016 | 24 | 20 | 44 | 45.5 |
| Wild-caught | 169 | unknown | 2, 3 | 2016 | 30 | 40 | 70 | 57.1 |

|             |     |         |      |      |    |    |    |      |
|-------------|-----|---------|------|------|----|----|----|------|
| Wild-caught | 171 | unknown | 1    | 2017 | 22 | 21 | 43 | 48.8 |
| Wild-caught | 171 | unknown | 2    | 2017 | 19 | 21 | 40 | 52.5 |
| Wild-caught | 171 | unknown | 3    | 2018 | 22 | 23 | 45 | 51.1 |
| Wild-caught | 174 | unknown | 1    | 2016 | 21 | 20 | 41 | 48.8 |
| Wild-caught | 174 | unknown | 2    | 2017 | 17 | 26 | 43 | 60.5 |
| Wild-caught | 175 | unknown | 1    | 2016 | 25 | 17 | 42 | 40.5 |
| Wild-caught | 175 | unknown | 2    | 2016 | 18 | 17 | 35 | 48.6 |
| Wild-caught | 175 | unknown | 3    | 2017 | 28 | 29 | 57 | 50.9 |
| Wild-caught | 177 | unknown | 1    | 2016 | 20 | 11 | 31 | 35.5 |
| Wild-caught | 177 | unknown | 2    | 2016 | 15 | 18 | 33 | 54.5 |
| Wild-caught | 178 | unknown | 1    | 2017 | 21 | 19 | 40 | 47.5 |
| Wild-caught | 178 | unknown | 2    | 2017 | 10 | 17 | 27 | 63.0 |
| Wild-caught | 178 | unknown | 3, 4 | 2018 | 19 | 22 | 41 | 53.7 |
| Wild-caught | 179 | unknown | 1    | 2017 | 19 | 18 | 37 | 48.6 |
| Wild-caught | 179 | unknown | 2    | 2017 | 15 | 21 | 36 | 58.3 |
| Wild-caught | 179 | unknown | 3    | 2018 | 10 | 10 | 20 | 50.0 |
| Wild-caught | 180 | unknown | 1, 2 | 2017 | 18 | 14 | 32 | 43.8 |
| Wild-caught | 182 | unknown | 1    | 2017 | 7  | 10 | 17 | 58.8 |
| Wild-caught | 182 | unknown | 2    | 2017 | 7  | 7  | 14 | 50.0 |
| Wild-caught | 182 | unknown | 3    | 2018 | 20 | 15 | 35 | 42.9 |
| Wild-caught | 184 | unknown | 1, 2 | 2017 | 27 | 36 | 63 | 57.1 |
| Wild-caught | 185 | unknown | 2    | 2017 | 8  | 10 | 18 | 55.6 |
| Wild-caught | 186 | unknown | 2    | 2017 | 8  | 10 | 18 | 55.6 |
| Wild-caught | 187 | unknown | 1, 2 | 2017 | 11 | 13 | 24 | 54.2 |
| Wild-caught | 191 | unknown | 1, 2 | 2017 | 39 | 33 | 72 | 45.8 |
| Wild-caught | 192 | unknown | 1    | 2017 | 19 | 21 | 40 | 52.5 |
| Wild-caught | 192 | unknown | 2    | 2017 | 6  | 11 | 17 | 64.7 |
| Wild-caught | 192 | unknown | 3    | 2018 | 10 | 6  | 16 | 37.5 |
| Wild-caught | 193 | unknown | 1    | 2017 | 8  | 2  | 10 | 20.0 |
| Wild-caught | 194 | unknown | 2    | 2017 | 4  | 15 | 19 | 78.9 |
| Wild-caught | 196 | unknown | 2    | 2017 | 17 | 21 | 38 | 55.3 |
| Wild-caught | 196 | unknown | 3    | 2018 | 14 | 15 | 29 | 51.7 |
| Wild-caught | 197 | unknown | 1    | 2017 | 19 | 25 | 44 | 56.8 |

|             |        |            |      |      |    |    |    |      |
|-------------|--------|------------|------|------|----|----|----|------|
| Wild-caught | 197    | unknown    | 2    | 2017 | 9  | 11 | 20 | 55.0 |
| Wild-caught | 199    | unknown    | 1    | 2017 | 9  | 7  | 16 | 43.8 |
| Wild-caught | 199    | unknown    | 2    | 2017 | 7  | 6  | 13 | 46.2 |
| Wild-caught | 201    | unknown    | 1, 2 | 2017 | 11 | 12 | 23 | 52.2 |
| Wild-caught | 201    | unknown    | 3    | 2018 | 7  | 7  | 14 | 50.0 |
| Wild-caught | 202    | unknown    | 1    | 2017 | 7  | 13 | 20 | 65.0 |
| Wild-caught | 202    | unknown    | 2    | 2018 | 5  | 9  | 14 | 64.3 |
| Wild-caught | 203    | unknown    | 1    | 2017 | 7  | 14 | 21 | 66.7 |
| Wild-caught | 204    | unknown    | 1    | 2017 | 17 | 13 | 30 | 43.3 |
| Wild-caught | 204    | unknown    | 2    | 2017 | 15 | 14 | 29 | 48.3 |
| Wild-caught | 205    | unknown    | 1    | 2017 | 21 | 13 | 34 | 38.2 |
| Wild-caught | 205    | unknown    | 2    | 2017 | 6  | 11 | 17 | 64.7 |
| Wild-caught | 207    | unknown    | 1, 2 | 2017 | 37 | 32 | 69 | 46.4 |
| Wild-caught | 208    | unknown    | 1    | 2017 | 8  | 9  | 17 | 52.9 |
| Wild-caught | 208    | unknown    | 2    | 2017 | 10 | 14 | 24 | 58.3 |
| Wild-caught | 211    | unknown    | 1, 2 | 2017 | 27 | 13 | 40 | 32.5 |
| Lab cross   | 10-F1  | 18-M1      | 1    | 2019 | 24 | 24 | 48 | 50.0 |
| Lab cross   | 13-F1  | 107-M1     | 1    | 2018 | 8  | 9  | 17 | 52.9 |
| Lab cross   | 151-M1 | 178-F1     | 1    | 2019 | 21 | 35 | 56 | 62.5 |
| Lab cross   | 163-F1 | 163-M1     | 1    | 2019 | 34 | 42 | 76 | 55.3 |
| Lab cross   | 169-F1 | 179-M1     | 1    | 2019 | 16 | 18 | 34 | 52.9 |
| Lab cross   | 171-F1 | 162-M1     | 1    | 2018 | 5  | 8  | 13 | 61.5 |
| Lab cross   | 177-F1 | 177/162-M1 | 1    | 2019 | 5  | 13 | 18 | 72.2 |
| Lab cross   | 177-F2 | 177/162-M2 | 1    | 2019 | 10 | 20 | 30 | 66.7 |
| Lab cross   | 199-F1 | 199-M1     | 1    | 2018 | 7  | 9  | 16 | 56.3 |
| Lab cross   | 199-F1 | 199-M1     | 2    | 2018 | 6  | 12 | 18 | 66.7 |
| Lab cross   | 199-F1 | 199-M1     | 3    | 2019 | 3  | 11 | 14 | 78.6 |
| Lab cross   | 205-F1 | 205-M1     | 1    | 2018 | 19 | 10 | 29 | 34.5 |
| Lab cross   | 208-F1 | 208-M1     | 1    | 2018 | 20 | 24 | 44 | 54.5 |
| Lab cross   | 211-F1 | 211-M1     | 1    | 2019 | 15 | 4  | 19 | 21.1 |
| Lab cross   | 34-F1  | 174-M1     | 1    | 2019 | 17 | 20 | 37 | 54.1 |
| Lab cross   | 47-F1  | 47-M1      | 1    | 2018 | 38 | 37 | 75 | 49.3 |
| Lab cross   | 47-F1  | 47-M1      | 2    | 2019 | 19 | 14 | 33 | 42.4 |

|           |       |        |   |      |    |    |    |      |
|-----------|-------|--------|---|------|----|----|----|------|
| Lab cross | 48-M1 | 48-F1  | 1 | 2019 | 26 | 27 | 53 | 50.9 |
| Lab cross | 83-F1 | 203-M1 | 1 | 2019 | 5  | 5  | 10 | 50.0 |
| Lab cross | 9-M1  | 132-F1 | 1 | 2018 | 25 | 10 | 35 | 28.6 |

**Supplementary Table 3.** Top 100 regions of the *Trachelipus rathkei* assembly matching one or more *Wolbachia* genomes.

| Contig                   | Matching <i>Wolbachia</i> genome | E-value | Bitscore | Length | Percent Identity |
|--------------------------|----------------------------------|---------|----------|--------|------------------|
| contig41205:46995-50826  | NZ_QPIP01000040.1                | 0       | 5802     | 3898   | 92.894           |
| contig21655:23176-27650  | NZ_CP016430.1                    | 0       | 4834     | 4092   | 85.973           |
| contig82518:11250-14109  | NZ_QPIP01000225.1                | 0       | 4420     | 2894   | 93.988           |
| contig24014:19607-22010  | NZ_QPIP01000012.1                | 0       | 3807     | 2393   | 95.153           |
| contig82518:31954-35917  | NZ_CAOH01000056.1                | 0       | 3714     | 4061   | 80.325           |
| contig22648:52901-55829  | NZ_QPIP01000225.1                | 0       | 3610     | 2955   | 87.174           |
| contig60599:36848-52880  | NZ_CP041215.1                    | 0       | 3606     | 4456   | 77.536           |
| contig111166:29090-31313 | NZ_MNCG01000080.1                | 0       | 2438     | 2274   | 83.641           |
| contig101838:5953-13532  | NZ_CP041215.1                    | 0       | 2355     | 2341   | 81.888           |
| contig104492:6893-11374  | NZ_CP041215.1                    | 0       | 1894     | 2067   | 79.971           |
| contig24014:16199-17706  | NZ_MUJL01000059.1                | 0       | 1819     | 1384   | 88.584           |
| contig140396:3608-5757   | NZ_QPIP01000011.1                | 0       | 1807     | 1695   | 83.481           |
| contig6767:28422-30540   | NZ_QPIP01000011.1                | 0       | 1807     | 1695   | 83.481           |
| contig62661:89289-93752  | NZ_CP041215.1                    | 0       | 1794     | 1975   | 79.747           |
| contig54256:25557-27714  | NZ_QPIP01000011.1                | 0       | 1784     | 1705   | 82.991           |
| contig10767:48224-50433  | NZ_NSDS01000079.1                | 0       | 1773     | 2019   | 79.693           |
| contig83347:6124-8304    | NZ_CP016430.1                    | 0       | 1707     | 2000   | 79.1             |
| contig8667:11430-15085   | NZ_CP015510.2                    | 0       | 1693     | 2461   | 75.457           |
| contig82518:22137-23924  | NZ_QPIP01000225.1                | 0       | 1681     | 1160   | 92.5             |
| contig4956:73158-74195   | NZ_CAOH01000048.1                | 0       | 1635     | 1039   | 94.706           |
| contig54255:38034-40169  | NZ_QPIP01000011.1                | 0       | 1634     | 1708   | 81.03            |
| contig28080:13103-16290  | NZ_CP015510.2                    | 0       | 1625     | 2450   | 74.735           |
| contig54256:19275-20850  | NZ_LRUH01000003.1                | 0       | 1618     | 1434   | 85.146           |
| contig41156:47828-49356  | NZ_QPIP01000070.1                | 0       | 1611     | 1570   | 83.312           |
| contig120126:10876-13379 | NZ_KB223538.1                    | 0       | 1608     | 1371   | 86.287           |
| contig6767:22276-23850   | NZ_LRUH01000003.1                | 0       | 1604     | 1441   | 84.733           |
| contig4956:78999-82475   | NZ_VCEG01000122.1                | 0       | 1592     | 1355   | 85.83            |
| contig4865:65822-67934   | NZ_QPIP01000120.1                | 0       | 1591     | 1221   | 88.37            |
| contig4956:77436-78667   | NZ_QPIP01000116.1                | 0       | 1537     | 1206   | 88.557           |
| contig110376:12951-16136 | NZ_CP015510.2                    | 0       | 1481     | 2536   | 73.226           |
| contig45554:30664-32437  | NZ_QPIP01000040.1                | 0       | 1466     | 970    | 93.505           |
| contig26619:11904-13635  | NZ_KB223538.1                    | 0       | 1457     | 1494   | 81.124           |
| contig12055:11602-13784  | NZ_QPIP01000093.1                | 0       | 1446     | 1213   | 86.562           |
| contig55499:34817-37014  | NZ_KB223538.1                    | 0       | 1446     | 1236   | 86.084           |
| contig120015:7288-11014  | NZ_CP015510.2                    | 0       | 1439     | 2357   | 73.568           |
| contig56420:32935-36636  | NZ_CP015510.2                    | 0       | 1405     | 2481   | 72.229           |
| contig57015:7061-9509    | NZ_CAOH01000065.1                | 0       | 1397     | 1300   | 83.692           |

|                          |                   |   |      |      |        |
|--------------------------|-------------------|---|------|------|--------|
| contig97794:44314-47449  | NZ_CP015510.2     | 0 | 1366 | 2461 | 72.694 |
| contig43090:31693-34077  | NZ_CP015510.2     | 0 | 1361 | 1863 | 76.436 |
| contig59781:1759-2780    | NZ_CAOH01000048.1 | 0 | 1343 | 1043 | 90.604 |
| contig57015:21936-26306  | NZ_CAOH01000065.1 | 0 | 1337 | 1259 | 83.4   |
| contig36754:35171-36510  | NZ_KB223538.1     | 0 | 1330 | 1402 | 80.243 |
| contig581:4071-5440      | NZ_NSDS01000070.1 | 0 | 1269 | 1152 | 84.549 |
| contig42215:18348-19410  | NZ_NSDS01000070.1 | 0 | 1257 | 1080 | 85.741 |
| contig131151:4311-5431   | NZ_NSDS01000070.1 | 0 | 1247 | 1139 | 84.197 |
| contig6767:8936-12307    | NZ_NSDS01000070.1 | 0 | 1242 | 1154 | 83.882 |
| contig47840:6928-9012    | NZ_NSDS01000070.1 | 0 | 1236 | 1145 | 83.843 |
| contig108259:12794-14948 | NZ_NSDS01000070.1 | 0 | 1228 | 1138 | 83.743 |
| contig110377:9706-11307  | NZ_RWIK01000003.1 | 0 | 1224 | 1581 | 77.293 |
| contig97486:21655-25569  | NZ_CP041215.1     | 0 | 1200 | 1590 | 76.541 |
| contig66402:15885-18640  | NZ_LK055284.1     | 0 | 1199 | 1815 | 74.49  |
| contig10737:33945-36112  | NZ_NSDS01000070.1 | 0 | 1194 | 1146 | 83.333 |
| contig107168:4876-8422   | NZ_LK055284.1     | 0 | 1191 | 1822 | 74.424 |
| contig56531:7008-8374    | NZ_LSY01000126.1  | 0 | 1179 | 810  | 91.728 |
| contig25813:9937-11304   | NZ_LSY01000126.1  | 0 | 1177 | 811  | 91.615 |
| contig8667:23939-25563   | NZ_RWIK01000003.1 | 0 | 1177 | 1651 | 75.954 |
| contig56531:9367-10734   | NZ_LSY01000126.1  | 0 | 1172 | 811  | 91.492 |
| contig17820:18438-21324  | NZ_CTEH01000015.1 | 0 | 1169 | 829  | 91.435 |
| contig79792:23503-24741  | NZ_LSY01000126.1  | 0 | 1166 | 812  | 91.379 |
| contig79792:26192-27559  | NZ_LSY01000126.1  | 0 | 1163 | 811  | 91.245 |
| contig28080:22749-24395  | NZ_RWIK01000003.1 | 0 | 1162 | 1561 | 77.13  |
| contig98868:31083-33755  | NZ_CTEH01000006.1 | 0 | 1154 | 2240 | 71.607 |
| contig56531:4623-6003    | NZ_LSY01000126.1  | 0 | 1150 | 824  | 90.413 |
| contig72521:1-909        | NZ_CP041215.1     | 0 | 1095 | 932  | 85.73  |
| contig109514:3774-5787   | NZ_NSDS01000070.1 | 0 | 1070 | 996  | 83.735 |
| contig136622:7675-8872   | NZ_CAOH01000065.1 | 0 | 1049 | 963  | 84.112 |
| contig32215:18066-20042  | NZ_CTEH01000006.1 | 0 | 1040 | 2005 | 71.521 |
| contig98868:20772-22347  | NZ_RWIK01000003.1 | 0 | 1028 | 1637 | 74.221 |
| contig2827:52033-53374   | NZ_CTEH01000015.1 | 0 | 1027 | 1351 | 76.166 |
| contig42215:16743-18227  | NC_021084.1       | 0 | 1022 | 946  | 83.932 |
| contig58604:31642-34836  | NZ_CTEH01000006.1 | 0 | 1022 | 2450 | 69.918 |
| contig84414:19934-21197  | NZ_CP041215.1     | 0 | 1020 | 922  | 84.382 |
| contig97794:50638-52378  | NZ_RWIK01000003.1 | 0 | 1017 | 1380 | 76.304 |
| contig131151:5506-7007   | NZ_KB223533.1     | 0 | 1003 | 935  | 83.316 |
| contig103716:10622-12081 | NZ_NSDS01000070.1 | 0 | 998  | 1026 | 81.189 |
| contig136941:1093-1804   | NZ_QPIP01000070.1 | 0 | 980  | 714  | 91.036 |
| contig4956:87666-89184   | NZ_CAOH01000037.1 | 0 | 952  | 750  | 88     |



|                                              |                   |   |     |      |        |
|----------------------------------------------|-------------------|---|-----|------|--------|
| contig113691:13388-16226                     | NZ_CP041215.1     | 0 | 940 | 1375 | 75.345 |
| contig62357:26051-29274                      | NC_010981.1       | 0 | 930 | 2607 | 68.7   |
| contig22648:60781-63093                      | NZ_CP041215.1     | 0 | 915 | 1236 | 75.971 |
| contig90834:10305-13093                      | NZ_CTEH01000006.1 | 0 | 900 | 1594 | 72.271 |
| contig5091:23161-24553                       | NZ_QPIP01000017.1 | 0 | 898 | 1403 | 74.626 |
| contig24485:37434-40025                      | NZ_CP041215.1     | 0 | 889 | 1709 | 72.147 |
| contig98868:22871-23971                      | NZ_RWIK01000003.1 | 0 | 884 | 992  | 80.444 |
| contig28080:19443-20340                      | NZ_RWIK01000003.1 | 0 | 864 | 882  | 81.859 |
| contig20306:1-723                            | NZ_CP011148.1     | 0 | 850 | 729  | 85.597 |
| NODE_4409_length_2226_cov_13.672390:1-980    | NZ_CAOH01000065.1 | 0 | 847 | 745  | 85.235 |
| contig8667:22312-23414                       | NZ_RWIK01000003.1 | 0 | 837 | 972  | 79.835 |
| contig64403:13606-14996                      | NZ_KB223533.1     | 0 | 830 | 667  | 87.706 |
| contig51480:5191-10342                       | NZ_CP041215.1     | 0 | 825 | 1196 | 75.084 |
| contig110377:12182-13291                     | NZ_RWIK01000003.1 | 0 | 820 | 984  | 78.455 |
| contig67097:19963-22152                      | NZ_CP041215.1     | 0 | 815 | 1132 | 75.883 |
| NODE_1677_length_3365_cov_23.488464:190-1484 | NZ_CAOH01000066.1 | 0 | 792 | 963  | 78.712 |
| contig42215:13837-14533                      | NZ_RWIK01000007.1 | 0 | 775 | 668  | 85.629 |
| contig21865:12389-13705                      | NZ_KB223533.1     | 0 | 769 | 679  | 85.272 |
| contig55499:23126-24227                      | NZ_CP034335.1     | 0 | 750 | 735  | 82.313 |
| contig4956:83945-85499                       | NZ_CAOH01000037.1 | 0 | 736 | 727  | 82.256 |
| contig122193:35489-36065                     | NZ_NSDS01000070.1 | 0 | 725 | 578  | 87.889 |
| contig82518:38729-39602                      | NZ_LSYY01000140.1 | 0 | 720 | 885  | 78.418 |

**Supplementary Table 4.** Initial set of candidate primers for Y chromosome markers. None of the primer pairs from this initial set produced the expected patterns of male-specific amplification.

| ID         | Forward primer         | Reverse primer         | Expected product size |
|------------|------------------------|------------------------|-----------------------|
| TrYJa19_3  | GGGACACTGTTGTGAGAGCA   | CGCCAACAACCAGATGCG     | 160                   |
| TrYJa19_21 | CTCTCACGTTTCGGAACCACT  | TCACTTTGGTTTTGCATGTCGA | 118                   |
| TrYJa19_9  | TTCCTTTCCACCCCTATTTGCA | GCAAAGTGCTTACATGATTGCC | 100                   |
| TrYJa19_19 | CGTGTCATTTTCTGTCAGCGA  | CCCAAGGCAATGAAGCTGA    | 114                   |
| TrYJa19_4  | ACATCAGCAATCGCATCGT    | TCGAGGTTGCGGATTCTGT    | 120                   |
| TrYJa19_5  | AGGCCCTATTAGGAAGACCCA  | AAGGCCTGCTACCATGCG     | 104                   |
| TrYJa19_22 | AGCCTTGTGTGACCTTTTCGA  | CCTCACAGGCGGGACAAA     | 145                   |
| TrYJa19_16 | TGGTGTCATTTTTAACGGCAGA | GCAGGCAGTTTGTGTTGCGA   | 140                   |
| TrYJa19_18 | GAGCAACAAGAATTCCTCGTTG | TCCGAGAACAAGTAAATCGTGC | 100                   |
| TrYJa19_20 | CGCAGCCGCTGAAGGTAT     | CACTTCCCATCAAAGTGTCCA  | 176                   |
| TrYJa19_1  | TGCAACTCATGGATTGTAAGCA | GGACACTGTCCCGTTCAAAAC  | 101                   |
| TrYJa19_7  | TTTGGCGTGGTTATGGCA     | GTGTCCCAGTTATCAGGAACCT | 108                   |
| TrYJa19_10 | TGGTGGCATTCTTTTCTCTGC  | ACCACTAAGGGTTACCGCT    | 237                   |
| TrYJa19_6  | CCCAGGATTCTTCGAGCCC    | TGCAGAGTGATCCCCGGT     | 234                   |
| TrYJa19_17 | GAAGGAGTCAGGCGCGTT     | GCTTCTTGCGTTAGACGAAAT  | 236                   |
| TrYJa19_8  | CATCTTCTGGATGCGGCT     | TGGCATCGTGTGTTCCGA     | 228                   |
